# Supplementary material for: A Unique Combination of Male Germ Cell miRNAs Coordinates Gonocyte Differentiation
Source: PLoS One. 2012 Apr 20;7(4):e35553. doi: 10.1371/journal.pone.0035553 (PMC3334999; doi:10.1371/journal.pone.0035553)
Supplement: Table S3 — miRNA molecules ranked according to their fold change between gonocytes and spermatogonia. Total RNA from highly enriched gonocytes and spermatogonia was labelled and hybridized to the Illumina mouse miRNA microarray (version 1 revision 2). The data was backgrounds subtracted and normalised against the mean of (small nuclear RNA) snoRNA 142 and snoRNA234-1. The miRNA was then ranked according to its fold change between gonocytes and spermatogonia (gonocytes/spermatogonia). (XLS) [file pone.0035553.s005.xls]

## Sheet: Sheet1
Table S3: miRNA molecules ranked according to their fold change between gonocytes and spermatogonia.
Total RNA from highly enriched gonocytes and spermatogonia was labelled and hybridized to the Illumina mouse miRNA microarray (version 1 revision 2). The data was backgrounds subtracted and normalised against the mean of (small nuclear RNA) snoRNA 142 and snoRNA234-1. The miRNA was then ranked according to its fold change between gonocytes and spermatogonia (gonocytes/spermatogonia).
GENE NAME	gonocytes1	gonocytes2	gonocytes3	Gono Avg		spg1	spg2	spg3	spg Avg		ratio g/s	>3	Ratio s/g	>3
mmu-miR-135a*	0.00890816	0.00528133	0.00192806	0.00537252		0.000453213	0.00184005	-0.00207993	7.1112e-05		75.5501	mmu-miR-135a*	0.0132363	NO
mmu-miR-669k	-0.00584226	-0.000469223	0.000704425	-0.00186902		0.000148476	0.00226353	-0.00284239	-0.000143462		13.028	mmu-miR-669k	0.0767578	NO
mmu-miR-695	0.0108852	0.00133467	0.00310038	0.00510676		0.00186034	-0.000752618	9.43539e-05	0.000400691		12.7449	mmu-miR-695	0.0784629	NO
mmu-miR-346	2.8387	0.0276917	0.0457349	0.97071		0.0951388	0.0937939	0.0561088	0.0816805		11.8842	mmu-miR-346	0.0841451	NO
mmu-miR-150*	-0.0062852	-0.00167938	-0.00167306	-0.00321255		0.000805101	0.000549058	-0.00270287	-0.000449569		7.14583	mmu-miR-150*	0.139942	NO
mmu-miR-138*	0.00405204	0.0149674	0.0122237	0.0104144		0.00192991	0.000581432	0.00215054	0.00155396		6.70184	mmu-miR-138*	0.149213	NO
mmu-miR-10a*	0.257334	0.0290712	0.0132389	0.0998815		0.0125585	0.0216077	0.0119985	0.0153882		6.49077	mmu-miR-10a*	0.154065	NO
mmu-miR-448	0.0248108	0.000588217	0.000609326	0.00866946		0.00437603	-0.00259179	0.00324186	0.00167537		5.17467	mmu-miR-448	0.193249	NO
mmu-miR-590-5p	-0.0043983	0.00589995	0.00581468	0.00243878		0.00277748	-0.000770385	-0.000450218	0.000518958		4.69938	mmu-miR-590-5p	0.212794	NO
mmu-miR-675-5p	0.566533	0.0341076	0.0380392	0.212893		0.0508154	0.0518108	0.0385798	0.0470687		4.52303	mmu-miR-675-5p	0.221091	NO
mmu-miR-207	0.27901	0.0189046	0.0205791	0.106164		0.0227231	0.0268124	0.0254086	0.0249814		4.24974	mmu-miR-207	0.235308	NO
mmu-miR-682	0.423048	0.0339375	0.0282527	0.161746		0.0509193	0.0292717	0.045122	0.041771		3.87221	mmu-miR-682	0.25825	NO
mmu-miR-654-3p	0.993531	0.112524	0.116825	0.407627		0.119889	0.147073	0.118553	0.128505		3.17206	mmu-miR-654-3p	0.315252	NO
mmu-miR-719	1.27232	0.117722	0.142649	0.510896		0.145604	0.178673	0.161056	0.161778		3.15801	mmu-miR-719	0.316655	NO
mmu-miR-669g	-0.00666105	-0.00463711	-0.00209751	-0.00446522		0.0013932	0.00159981	-0.00723499	-0.001414		3.15788	mmu-miR-669g	0.316668	NO
mmu-miR-1198	2.88108	0.74896	0.697551	1.44253		0.472199	0.43985	0.499994	0.470681		3.06477	mmu-miR-1198	0.326289	NO
mmu-miR-875-3p	0.0816886	0.0136893	0.0167586	0.0373788		0.0148177	0.0146451	0.00897856	0.0128138		2.91708	NO	0.342808	NO
mmu-miR-705	0.0604887	0.00483017	0.0140622	0.0264603		0.0129955	0.0124977	0.00221656	0.00923659		2.86473	NO	0.349073	NO
mmu-miR-7a*	2.61734	0.37604	0.287877	1.09375		0.358628	0.433826	0.361967	0.384807		2.84234	NO	0.351823	NO
mmu-miR-21*	0.156846	0.0329542	0.0195947	0.0697983		0.0173822	0.0330953	0.0232981	0.0245919		2.83826	NO	0.352328	NO
mmu-miR-122	0.273083	0.0346942	0.037321	0.115033		0.0340601	0.0559087	0.0420768	0.0440152		2.61348	NO	0.382631	NO
mmu-miR-763	0.084657	0.0141743	0.0165572	0.0384628		0.0210735	0.0105545	0.0142979	0.0153086		2.5125	NO	0.398011	NO
mmu-miR-291a-5p	0.480554	0.473487	0.505658	0.486566		0.191747	0.217792	0.19443	0.201323		2.41684	NO	0.413764	NO
mmu-miR-290-5p	0.71638	0.962471	1.10161	0.92682		0.39691	0.423505	0.464261	0.428225		2.16433	NO	0.462037	NO
mmu-miR-568	-0.00862778	-0.00356194	-0.00561762	-0.00593578		-0.00428741	0.00220761	-0.00643785	-0.00283922		2.09064	NO	0.478322	NO
mmu-miR-294*	0.0376876	0.0517896	0.0493191	0.0462654		0.0220535	0.020479	0.0243664	0.0222996		2.07472	NO	0.481994	NO
mmu-miR-718	0.0751199	0.0282735	0.0189776	0.0407903		0.020721	0.0228405	0.0179555	0.0205057		1.98922	NO	0.502709	NO
mmu-miR-697	0.0939872	0.0345765	0.0259558	0.0515065		0.026115	0.028457	0.0271124	0.0272281		1.89167	NO	0.528635	NO
mmu-miR-486	1.52951	1.30475	1.65092	1.49506		0.652999	0.413207	1.33375	0.799987		1.86885	NO	0.535087	NO
mmu-miR-138	0.0896507	0.192376	0.130602	0.137543		0.0659843	0.0795518	0.0805365	0.0753575		1.8252	NO	0.547885	NO
mmu-miR-699	2.27969	0.632229	0.627696	1.17987		0.573552	0.74813	0.623501	0.648394		1.81968	NO	0.549546	NO
mmu-miR-302d	0.0180901	0.0318417	0.0286932	0.0262083		0.0167242	0.0158271	0.0107742	0.0144419		1.81475	NO	0.551041	NO
mmu-miR-302c	0.0137079	0.0144146	0.00941043	0.012511		0.00934799	0.00762373	0.00391096	0.00696089		1.79732	NO	0.556384	NO
mmu-miR-488	-0.0085737	-0.00263451	-0.00791933	-0.00637584		-0.0033151	-0.00251624	-0.00484448	-0.00355861		1.79167	NO	0.558139	NO
mmu-miR-106a:9.1	0.450317	0.125823	0.115171	0.230437		0.100842	0.12552	0.162949	0.12977		1.77573	NO	0.563149	NO
mmu-miR-129-5p	0.313654	0.206563	0.186938	0.235718		0.136647	0.113084	0.158533	0.136088		1.7321	NO	0.577333	NO
mmu-miR-220	-0.00630873	-0.00350418	-0.00334663	-0.00438651		-0.00200391	-0.00117933	-0.00449417	-0.00255914		1.71406	NO	0.583411	NO
mmu-miR-466d-5p	0.106807	0.0123097	0.00639307	0.0418366		0.0281405	0.0293185	0.0160747	0.0245112		1.70683	NO	0.58588	NO
mmu-miR-323-5p	0.0952958	0.00514166	0.0114831	0.0373069		0.0227375	0.0211	0.0218126	0.0218833		1.70481	NO	0.586577	NO
mmu-miR-882	-0.00268453	0.00414441	0.00604076	0.00250021		0.000921766	0.0024033	0.00109662	0.0014739		1.69633	NO	0.589508	NO
mmu-miR-292-3p	0.0437781	0.0747515	0.0850737	0.0678678		0.04734	0.032915	0.0398479	0.0400343		1.69524	NO	0.589887	NO
mmu-miR-212	1.71321	0.671457	0.688546	1.0244		0.568028	0.756176	0.521883	0.615362		1.66472	NO	0.600702	NO
mmu-miR-453	0.12032	0.0164869	0.0182519	0.0516863		0.0252466	0.0391546	0.0302481	0.0315498		1.63825	NO	0.610409	NO
mmu-miR-135b	1.12816	1.54989	1.10498	1.26101		0.506422	1.00409	0.850296	0.786936		1.60243	NO	0.624051	NO
mmu-miR-137	0.0329118	0.022193	0.0229754	0.0260267		0.0158236	0.0211833	0.0120905	0.0163658		1.59031	NO	0.628807	NO
mmu-miR-877*	0.932045	0.815134	0.672305	0.806495		0.42149	0.548437	0.557584	0.50917		1.58394	NO	0.631337	NO
mmu-miR-293	1.05998	1.04449	1.02695	1.04381		0.643237	0.674364	0.687033	0.668211		1.5621	NO	0.640166	NO
mmu-miR-758	0.187447	0.0807025	0.073425	0.113858		0.0691406	0.0749121	0.0747698	0.0729408		1.56097	NO	0.640628	NO
mmu-miR-125a-3p	0.121016	0.122521	0.142513	0.128683		0.0802112	0.0616419	0.110275	0.0840428		1.53116	NO	0.653099	NO
mmu-miR-804	0.000830708	0.00424407	0.00433602	0.00313693		0.00287778	0.0034491	-4.23723e-05	0.00209484		1.49746	NO	0.667797	NO
mmu-miR-291b-3p	0.0768913	0.104628	0.114675	0.0987314		0.0591891	0.0649084	0.0737953	0.0659643		1.49674	NO	0.668119	NO
mmu-miR-20a*	2.20419	1.04289	0.708398	1.31849		0.692511	1.15762	0.814517	0.888217		1.48443	NO	0.673661	NO
mmu-miR-451	4.05136	3.93831	4.73628	4.24198		2.77484	2.43744	3.38696	2.86641		1.47989	NO	0.675725	NO
mmu-miR-186*	0.0165794	0.0201055	0.0104468	0.0157106		0.0122228	0.00754307	0.012477	0.0107476		1.46177	NO	0.684102	NO
mmu-miR-1186	0.349822	0.816421	0.606149	0.590797		0.465075	0.419815	0.329861	0.404917		1.45906	NO	0.685373	NO
mmu-miR-301b	0.0170742	0.0464702	0.0270483	0.0301976		0.0120712	0.029702	0.0203247	0.0206993		1.45887	NO	0.685464	NO
mmu-miR-292-5p	0.242625	0.379633	0.529389	0.383882		0.234571	0.319802	0.243676	0.266016		1.44308	NO	0.692963	NO
mmu-miR-298	0.85171	1.01142	1.37519	1.07944		0.768702	0.800612	0.725909	0.765075		1.4109	NO	0.70877	NO
mmu-miR-504	3.42552	2.43962	1.92123	2.59546		1.57641	2.23015	1.7185	1.84169		1.40928	NO	0.709581	NO
mmu-miR-875-5p	-0.00834441	-0.0036455	-0.00662434	-0.00620475		-0.00615356	-0.00359386	-0.00357667	-0.00444136		1.39704	NO	0.715801	NO
mmu-miR-877	0.604787	0.786019	0.698068	0.696291		0.477954	0.579723	0.437976	0.498551		1.39663	NO	0.716009	NO
mmu-miR-295	0.963266	1.19288	1.22501	1.12705		0.75993	0.751636	0.922242	0.811269		1.38924	NO	0.719815	NO
mmu-miR-139-5p	1.62101	1.82708	1.83338	1.76049		1.45999	1.12646	1.22446	1.2703		1.38588	NO	0.721562	NO
mmu-miR-300*	0.00257821	-0.00141303	0.000998209	0.00072113		0.00144504	0.00251422	-0.00235768	0.000533856		1.35079	NO	0.740305	NO
mmu-miR-221	0.717997	0.352814	0.346436	0.472416		0.301654	0.482226	0.278568	0.354149		1.33394	NO	0.749656	NO
mmu-miR-184	0.155625	0.461362	0.597403	0.404797		0.317111	0.318255	0.275159	0.303509		1.33372	NO	0.74978	NO
mmu-let-7g*	0.217636	0.13663	0.141678	0.165314		0.166996	0.0816021	0.126104	0.124901		1.32357	NO	0.755534	NO
mmu-miR-691	0.0848963	0.0362177	0.0361203	0.0524114		0.0422522	0.0419123	0.0349773	0.0397139		1.31972	NO	0.757735	NO
mmu-miR-707	0.283708	0.102201	0.0880227	0.157977		0.131492	0.128247	0.09951	0.11975		1.31923	NO	0.75802	NO
mmu-miR-291b-5p	0.24757	0.480123	0.549629	0.425774		0.266661	0.421308	0.283754	0.323908		1.31449	NO	0.76075	NO
mmu-miR-295*	0.0912178	0.0838872	0.0942921	0.089799		0.0757317	0.0579233	0.0723478	0.0686676		1.30774	NO	0.764681	NO
mmu-miR-99b*	0.0855655	0.209401	0.191992	0.16232		0.112364	0.0912894	0.168717	0.124123		1.30773	NO	0.764685	NO
mmu-miR-130b	0.805831	1.44293	1.06673	1.10516		0.642058	0.930012	0.964575	0.845548		1.30704	NO	0.765089	NO
mmu-miR-702	0.212613	0.162037	0.161052	0.178568		0.147373	0.142628	0.121466	0.137156		1.30193	NO	0.768088	NO
mmu-miR-106a	1.90611	1.83777	1.44235	1.72874		1.20443	1.11419	1.68933	1.33598		1.29399	NO	0.772804	NO
mmu-miR-291a-3p	0.30023	0.415946	0.333272	0.349816		0.222338	0.318322	0.276152	0.272271		1.28481	NO	0.778326	NO
mmu-miR-704	0.0430675	0.0283678	0.0274703	0.0329685		0.0255123	0.0295143	0.0225078	0.0258448		1.27563	NO	0.783924	NO
mmu-miR-302c*	-0.00358448	-0.00336307	0.00106814	-0.0019598		0.00184654	-0.00290061	-0.00359676	-0.00155028		1.26416	NO	0.791037	NO
mmu-miR-20b	0.876814	0.595892	0.662157	0.711621		0.446193	0.698563	0.561265	0.568673		1.25137	NO	0.799124	NO
mmu-miR-423-5p	0.197968	0.347184	0.293557	0.27957		0.245477	0.202826	0.222627	0.223643		1.25007	NO	0.799956	NO
mmu-miR-449c	0.00140214	0.0112284	0.00485472	0.00582844		0.00732037	0.00414468	0.00253313	0.00466606		1.24911	NO	0.800568	NO
mmu-miR-18a*	0.549679	0.851321	0.640488	0.680496		0.502034	0.517055	0.62188	0.54699		1.24407	NO	0.80381	NO
mmu-miR-15b*	1.85094	2.35384	2.19409	2.13295		1.48899	1.77149	1.90675	1.72241		1.23835	NO	0.807524	NO
mmu-miR-130b*	0.838315	0.731486	0.736652	0.768818		0.516158	0.649459	0.700137	0.621918		1.2362	NO	0.808927	NO
mmu-miR-27b*	0.245846	0.41661	0.331448	0.331301		0.280391	0.264291	0.270351	0.271678		1.21946	NO	0.820032	NO
mmu-miR-411*:9.1	0.375911	0.181785	0.144642	0.234113		0.181498	0.192577	0.202527	0.192201		1.21806	NO	0.820975	NO
mmu-miR-342-5p	1.17599	1.03559	1.15575	1.12244		0.84639	0.970533	0.94869	0.921871		1.21757	NO	0.821307	NO
mmu-miR-331-5p	0.157236	0.139144	0.0934083	0.129929		0.0919301	0.13486	0.0938894	0.106893		1.21551	NO	0.822702	NO
mmu-miR-684	0.0435551	0.091599	0.0526408	0.0625983		0.0630676	0.0522256	0.0400179	0.0517704		1.20915	NO	0.827025	NO
mmu-miR-200c*	0.0607014	0.0476893	0.0476899	0.0520269		0.0389315	0.0538193	0.0374133	0.043388		1.19911	NO	0.833954	NO
mmu-miR-223	2.73873	2.4277	2.29696	2.4878		1.90353	2.42189	1.91626	2.08056		1.19573	NO	0.836306	NO
mmu-miR-181b	3.06303	2.80728	3.05567	2.97533		2.67916	2.37339	2.41434	2.48897		1.19541	NO	0.836535	NO
mmu-miR-744*	0.271527	0.103423	0.0891755	0.154708		0.101164	0.155275	0.133954	0.130131		1.18886	NO	0.841139	NO
mmu-miR-378*	0.202632	0.297048	0.203087	0.234256		0.196027	0.217543	0.181409	0.198326		1.18116	NO	0.846624	NO
mmu-miR-294	0.62986	0.992112	1.1526	0.924859		0.801465	0.748746	0.813587	0.787933		1.17378	NO	0.851949	NO
mmu-let-7b*	0.135986	0.0715667	0.0609537	0.089502		0.0497334	0.103975	0.0762636	0.0766573		1.16756	NO	0.856488	NO
mmu-miR-149	1.26863	1.62224	1.58831	1.49306		1.10019	1.33647	1.40713	1.28126		1.1653	NO	0.858147	NO
mmu-miR-17*	1.59016	2.25341	2.17358	2.00572		1.47791	1.62777	2.06941	1.72503		1.16271	NO	0.860058	NO
mmu-miR-330*	0.230866	0.308752	0.240464	0.260027		0.161915	0.213541	0.297587	0.224347		1.15904	NO	0.862785	NO
mmu-miR-344	0.0833748	0.132515	0.0713464	0.0957454		0.0678468	0.0788587	0.101377	0.0826942		1.15782	NO	0.863689	NO
mmu-miR-32	0.0129954	0.0640299	0.0259564	0.0343272		0.0214092	0.0285014	0.0390639	0.0296582		1.15743	NO	0.863985	NO
mmu-miR-501-3p	0.118334	0.252789	0.175956	0.182359		0.150147	0.15362	0.178739	0.160835		1.13383	NO	0.881967	NO
mmu-miR-363	0.00357137	0.0139942	0.0209113	0.0128256		0.0132127	0.0119865	0.00890629	0.0113685		1.12817	NO	0.88639	NO
mmu-miR-744	0.871867	1.01569	1.21584	1.03447		0.908149	0.918917	0.944799	0.923955		1.11961	NO	0.893171	NO
mmu-miR-683	1.21017	1.56726	1.4066	1.39468		1.31644	0.714414	1.70996	1.24694		1.11848	NO	0.894071	NO
mmu-miR-574-5p	0.821096	1.21396	1.40307	1.14604		1.23585	0.920099	0.918057	1.02467		1.11845	NO	0.894094	NO
mmu-miR-296-3p	0.925079	1.19694	1.46391	1.19531		1.0422	1.0222	1.14764	1.07068		1.1164	NO	0.895739	NO
mmu-miR-1-2-as	0.00918677	0.0129205	0.00395288	0.0086867		0.00567821	0.00812536	0.00979268	0.00786541		1.10442	NO	0.905455	NO
mmu-miR-302b	0.0262151	0.03488	0.0468485	0.0359812		0.0268371	0.041059	0.0299087	0.0326016		1.10366	NO	0.906073	NO
mmu-miR-425	2.27344	2.20503	2.113	2.19716		1.89619	1.87969	2.20436	1.99341		1.10221	NO	0.907268	NO
mmu-miR-674	2.23342	1.91337	2.34749	2.16476		2.31342	1.56179	2.03046	1.96856		1.09967	NO	0.909364	NO
mmu-miR-370	0.166867	0.248398	0.290973	0.235413		0.269016	0.182512	0.195403	0.215644		1.09167	NO	0.916024	NO
mmu-miR-1187	0.256204	0.253806	0.331272	0.280427		0.302997	0.233773	0.235265	0.257345		1.08969	NO	0.91769	NO
mmu-miR-322*	2.11333	2.10303	1.75627	1.99088		1.71263	1.78739	2.00067	1.83356		1.0858	NO	0.920982	NO
mmu-let-7e	3.66828	2.91572	3.22719	3.2704		3.22205	1.94563	3.91307	3.02692		1.08044	NO	0.925551	NO
mmu-miR-208a	0.00427278	0.00303976	0.00386756	0.0037267		0.0044631	0.0019133	0.00400252	0.00345964		1.07719	NO	0.928339	NO
mmu-miR-542-5p	0.0268274	0.0648247	0.0351564	0.0422695		0.0397819	0.0342321	0.0437779	0.039264		1.07655	NO	0.928896	NO
mmu-miR-106b	2.71069	3.00838	2.47387	2.73098		2.16087	2.4562	3.01709	2.54472		1.0732	NO	0.931797	NO
mmu-miR-17	3.21775	3.41632	3.112	3.24869		3.02009	2.73949	3.33788	3.03249		1.07129	NO	0.93345	NO
mmu-miR-92a	2.1245	2.07835	2.75156	2.31814		2.43955	1.97075	2.08549	2.16526		1.0706	NO	0.934054	NO
mmu-miR-717	-0.0050403	-0.000713628	-0.000465094	-0.00207301		-0.00064867	-0.00160843	-0.00358948	-0.00194886		1.0637	NO	0.940113	NO
mmu-miR-493	0.10922	0.0602714	0.0650315	0.0781744		0.0600622	0.0666216	0.0951448	0.0739429		1.05723	NO	0.945871	NO
mmu-miR-22*	1.11028	0.980474	0.74783	0.946194		0.686511	1.01426	0.986275	0.895682		1.0564	NO	0.946615	NO
mmu-miR-324-5p	0.909787	1.12708	0.891636	0.976167		0.883749	0.927463	0.964271	0.925161		1.05513	NO	0.947749	NO
mmu-miR-721	0.00976362	0.0133059	0.0109339	0.0113345		0.0117847	0.0116069	0.00886599	0.0107525		1.05412	NO	0.948655	NO
mmu-miR-421	0.887304	1.54889	1.51532	1.31717		1.15978	1.17242	1.44693	1.25971		1.04562	NO	0.956373	NO
mmu-miR-193	0.742321	0.857822	0.464477	0.688207		0.579757	0.851397	0.546753	0.659302		1.04384	NO	0.958	NO
mmu-miR-764-5p	0.0171772	0.00670091	0.00869178	0.0108566		0.0135164	0.00774313	0.00995065	0.0104034		1.04356	NO	0.958255	NO
mmu-miR-151-3p	1.07013	1.40614	1.40133	1.29253		1.3944	1.25291	1.07269	1.24		1.04237	NO	0.959354	NO
mmu-miR-688	-0.0096043	-0.00501476	-0.00168534	-0.0054348		-0.00274541	-0.00546878	-0.00746643	-0.00522688		1.03978	NO	0.961743	NO
mmu-miR-34b-3p	0.424271	0.487056	0.734989	0.548772		0.474623	0.643046	0.467853	0.528507		1.03834	NO	0.963072	NO
mmu-miR-135a	1.03545	1.07101	1.13062	1.07903		0.790003	0.948272	1.37987	1.03938		1.03814	NO	0.96326	NO
mmu-miR-762	0.172562	0.0994441	0.098927	0.123644		0.11962	0.133902	0.10448	0.119334		1.03612	NO	0.965139	NO
mmu-miR-706	3.40714	3.17146	3.72805	3.43555		3.46878	2.91929	3.57035	3.31947		1.03497	NO	0.966212	NO
mmu-miR-669j	0.0121259	0.0102471	0.00812571	0.0101663		0.0140885	0.00823668	0.00718798	0.00983771		1.0334	NO	0.967682	NO
mmu-miR-455	2.13638	2.25618	2.38542	2.25933		2.27851	2.1646	2.1333	2.19214		1.03065	NO	0.97026	NO
mmu-miR-98	1.53752	2.09208	1.93044	1.85335		1.46904	1.9582	1.98557	1.80427		1.0272	NO	0.973519	NO
mmu-miR-483	0.174568	0.289597	0.373494	0.27922		0.329525	0.232936	0.254353	0.272271		1.02552	NO	0.975115	NO
mmu-miR-34c*	0.143511	0.241583	0.350439	0.245178		0.195345	0.321198	0.202093	0.239545		1.02351	NO	0.977027	NO
mmu-miR-181a-1*	0.155635	0.283828	0.197752	0.212405		0.170916	0.241543	0.210941	0.2078		1.02216	NO	0.978321	NO
mmu-miR-590-3p	-0.00780818	-0.00386042	-0.00364819	-0.0051056		-0.00484988	-0.00485281	-0.00532365	-0.00500878		1.01933	NO	0.981037	NO
mmu-miR-615-5p	0.0928628	0.0788655	0.104043	0.0919238		0.0889441	0.098739	0.0829633	0.0902155		1.01894	NO	0.981416	NO
mmu-miR-193*	0.848293	0.966709	0.828303	0.881102		0.744698	0.974012	0.876338	0.865016		1.0186	NO	0.981744	NO
mmu-miR-503	1.70213	2.32782	2.02688	2.01894		1.89579	1.9343	2.12142	1.98383		1.0177	NO	0.98261	NO
mmu-miR-106b*	1.16919	1.15257	1.17978	1.16718		1.07985	0.962779	1.41061	1.15108		1.01399	NO	0.986207	NO
mmu-miR-598	0.305496	0.376577	0.342137	0.341403		0.333928	0.305638	0.371907	0.337157		1.01259	NO	0.987563	NO
mmu-miR-484	1.21679	1.09714	1.47894	1.26429		1.22496	0.975879	1.55961	1.25348		1.00862	NO	0.99145	NO
mmu-miR-669i	0.0214811	0.00228232	0.000811954	0.00819178		0.0121479	0.0124279	-0.000203723	0.008124		1.00834	NO	0.991725	NO
mmu-miR-374*	-0.00640287	-0.00438021	-0.00395603	-0.00491303		-0.00457043	-0.00162318	-0.00843805	-0.00487722		1.00734	NO	0.992711	NO
mmu-miR-324-3p	2.48727	2.73604	2.91058	2.7113		2.85321	2.48487	2.74815	2.69541		1.0059	NO	0.994139	NO
mmu-miR-672	2.51638	3.21259	3.64802	3.12566		3.02688	2.74415	3.56878	3.11327		1.00398	NO	0.996035	NO
mmu-miR-206	0.0114677	0.0446416	0.0567614	0.0376236		0.0350411	0.0389669	0.03843	0.0374793		1.00385	NO	0.996166	NO
mmu-miR-93*	0.474277	0.837335	0.685941	0.665851		0.52949	0.749513	0.713055	0.664019		1.00276	NO	0.997249	NO
mmu-miR-93	2.54014	2.75457	2.46927	2.58799		2.36458	2.39964	2.98508	2.5831		1.00189	NO	0.998111	NO
mmu-miR-469	-0.000252856	0.00984013	0.00254759	0.00404495		0.00310608	0.00439329	0.00463087	0.00404341		1.00038	NO	0.999619	NO
mmu-miR-34c	0.0457622	0.0944241	0.0932119	0.0777994		0.069149	0.0918729	0.0726375	0.0778865		0.998882	NO	1.00112	NO
mmu-miR-142-5p	0.0902901	0.0807826	0.0749245	0.081999		0.0768783	0.105595	0.0638054	0.0820929		0.998856	NO	1.00114	NO
mmu-miR-551b	0.0263866	0.0275143	0.0256152	0.0265054		0.0270924	0.0287436	0.0240442	0.0266267		0.995442	NO	1.00458	NO
mmu-miR-23b	2.80913	3.15352	3.24614	3.0696		3.16997	3.10611	2.99827	3.09145		0.992931	NO	1.00712	NO
mmu-miR-378	0.705477	0.793284	0.65588	0.718214		0.62504	0.762899	0.786549	0.724829		0.990873	NO	1.00921	NO
mmu-miR-181a-2*	0.0591949	0.142177	0.138218	0.113197		0.125226	0.103185	0.115176	0.114529		0.988368	NO	1.01177	NO
mmu-miR-140*	2.86445	2.4711	2.50116	2.61224		2.38169	2.78878	2.77043	2.64697		0.986879	NO	1.0133	NO
mmu-miR-351	3.91921	3.81672	3.84547	3.86047		3.57628	4.43241	3.73251	3.91373		0.98639	NO	1.0138	NO
mmu-miR-873	0.0750618	0.0849304	0.062702	0.0742314		0.0764005	0.0720312	0.0774409	0.0752909		0.985928	NO	1.01427	NO
mmu-miR-710	0.0106016	0.0121064	0.0142508	0.0123196		0.012504	0.0103753	0.0147108	0.01253		0.983203	NO	1.01708	NO
mmu-miR-671-5p	0.00436588	0.0192963	0.0166585	0.0134402		0.0154434	0.0139802	0.0116822	0.0137019		0.9809	NO	1.01947	NO
mmu-miR-30a*	0.798591	1.13771	0.980028	0.97211		0.716243	1.22167	1.05692	0.998276		0.973789	NO	1.02692	NO
mmu-miR-331-3p	1.19387	1.44728	0.961251	1.2008		1.06826	1.45289	1.17995	1.2337		0.973332	NO	1.0274	NO
mmu-miR-801:9.1	0.692539	0.872199	1.18845	0.917728		1.06788	0.930341	0.831966	0.943395		0.972794	NO	1.02797	NO
mmu-miR-708	3.892	2.03794	2.20373	2.71122		2.54124	3.17343	2.64959	2.78809		0.972431	NO	1.02835	NO
mmu-miR-20a	4.29279	4.15142	4.21079	4.21833		3.61586	4.82019	4.65887	4.36497		0.966405	NO	1.03476	NO
mmu-miR-872*	1.64244	1.9474	2.08753	1.89246		2.06459	2.08456	1.76342	1.97086		0.960219	NO	1.04143	NO
mmu-miR-20b*	0.0137361	0.0206594	0.0155949	0.0166634		0.0162114	0.0206055	0.0152495	0.0173555		0.960127	NO	1.04153	NO
mmu-miR-28	1.4906	2.14307	2.24607	1.95991		2.02835	1.774	2.32463	2.04233		0.959646	NO	1.04205	NO
mmu-miR-99b	2.33772	2.55615	2.55899	2.48429		2.4518	2.28545	3.03806	2.59177		0.958528	NO	1.04327	NO
mmu-miR-151-5p	3.61359	3.05973	3.50125	3.39152		3.34243	3.48721	3.79468	3.54144		0.957668	NO	1.0442	NO
mmu-miR-328	1.89731	1.91804	2.02383	1.94639		2.13457	1.58114	2.38763	2.03444		0.956719	NO	1.04524	NO
mmu-miR-26b	2.69078	2.90151	3.07912	2.89047		3.08696	2.83049	3.15357	3.02367		0.955946	NO	1.04608	NO
mmu-miR-214	3.74693	3.62852	3.77382	3.71643		3.55602	4.15652	3.96403	3.89219		0.954842	NO	1.04729	NO
mmu-miR-322	2.12953	2.09447	2.09342	2.10581		2.03587	1.75247	2.85863	2.21566		0.95042	NO	1.05217	NO
mmu-miR-770-5p	0.5838	0.457831	0.544618	0.52875		0.636157	0.590469	0.443358	0.556661		0.949859	NO	1.05279	NO
mmu-miR-431*	0.00395591	0.0173553	0.014435	0.0119154		0.0137141	0.0118445	0.0121352	0.0125646		0.948333	NO	1.05448	NO
mmu-miR-30b	2.0717	2.38552	2.3287	2.26197		2.32714	2.40714	2.42476	2.38635		0.947882	NO	1.05498	NO
mmu-miR-320	2.71141	3.08884	3.25509	3.01845		3.01557	3.14966	3.3916	3.18561		0.947526	NO	1.05538	NO
mmu-let-7f	3.47328	3.14127	3.1955	3.27002		3.12532	2.89121	4.35087	3.4558		0.94624	NO	1.05681	NO
mmu-miR-325	0.0289578	0.0275564	0.0369966	0.0311703		0.0318151	0.0383586	0.0287497	0.0329745		0.945284	NO	1.05788	NO
mmu-let-7i	3.06256	3.13834	3.49796	3.23295		3.22352	2.8511	4.18613	3.42025		0.945238	NO	1.05793	NO
mmu-miR-124*	-0.0088675	-0.00368002	-0.00475273	-0.00576675		-0.00373371	-0.00665743	-0.00791306	-0.0061014		0.945152	NO	1.05803	NO
mmu-miR-423-3p	1.5638	1.63892	1.33636	1.51303		1.41337	1.62603	1.77051	1.6033		0.943693	NO	1.05967	NO
mmu-miR-345-5p	0.192149	0.40142	0.281945	0.291838		0.288084	0.341214	0.301009	0.310102		0.941102	NO	1.06258	NO
mmu-miR-196a	1.92077	1.95862	2.2526	2.044		2.22143	1.78882	2.51338	2.17454		0.939966	NO	1.06387	NO
mmu-miR-546	0.0657385	0.0572026	0.0689791	0.0639734		0.070855	0.0618254	0.0716142	0.0680982		0.939429	NO	1.06448	NO
mmu-miR-16*	0.0529166	0.0804536	0.0516925	0.0616876		0.0578035	0.0781519	0.0610593	0.0656716		0.939335	NO	1.06458	NO
mmu-miR-361	1.88953	1.72411	2.04625	1.88663		2.04821	1.91575	2.06407	2.00934		0.938928	NO	1.06504	NO
mmu-miR-326	0.829726	0.911457	0.804844	0.848676		0.96646	0.949218	0.806291	0.907323		0.935362	NO	1.0691	NO
mmu-miR-128	0.968063	1.3323	1.19761	1.16599		0.999225	1.43433	1.31451	1.24936		0.933275	NO	1.0715	NO
mmu-miR-483*	0.320022	0.411322	0.481521	0.404288		0.431583	0.40449	0.464477	0.433517		0.932578	NO	1.0723	NO
mmu-miR-191	3.66418	4.60632	4.50328	4.25793		4.31722	4.82137	4.5831	4.5739		0.930919	NO	1.07421	NO
mmu-miR-30c	2.81465	2.75234	3.00376	2.85692		2.96999	3.14445	3.10897	3.07447		0.929239	NO	1.07615	NO
mmu-miR-652	1.7301	2.68739	2.67744	2.36497		2.25367	2.94502	2.44324	2.54731		0.92842	NO	1.0771	NO
mmu-miR-296-5p	0.611564	0.765568	1.36108	0.912736		0.860102	0.925957	1.16693	0.984331		0.927265	NO	1.07844	NO
mmu-miR-147	0.0102508	0.0421683	0.022597	0.0250054		0.0170939	0.0306059	0.0333596	0.0270198		0.925446	NO	1.08056	NO
mmu-miR-15b	3.00094	3.01071	3.76004	3.25723		3.12143	3.43328	4.04456	3.53309		0.921921	NO	1.08469	NO
mmu-miR-681	0.0184825	0.0291729	0.0187521	0.0221359		0.0301623	0.0231696	0.0192522	0.0241947		0.914906	NO	1.09301	NO
mmu-miR-467g	-0.00574201	-0.00620296	-0.00294185	-0.00496227		-0.00196643	-0.0060408	-0.00827911	-0.00542878		0.914068	NO	1.09401	NO
mmu-miR-1196	0.125157	0.192055	0.325163	0.214125		0.231246	0.219125	0.253062	0.234477		0.913201	NO	1.09505	NO
mmu-miR-582-5p	0.104939	0.112977	0.11132	0.109745		0.135574	0.105854	0.119139	0.120189		0.913107	NO	1.09516	NO
mmu-miR-202-5p	3.33473	3.46465	3.37705	3.39214		3.0448	4.45665	3.66045	3.72063		0.911711	NO	1.09684	NO
mmu-miR-126-5p	1.54689	2.58052	2.82474	2.31738		2.27963	2.71675	2.63591	2.5441		0.910886	NO	1.09783	NO
mmu-miR-425*	0.123832	0.225009	0.125398	0.15808		0.128705	0.195182	0.197405	0.173764		0.909738	NO	1.09922	NO
mmu-let-7g	3.35366	3.6997	4.04362	3.69899		3.86701	4.11546	4.22537	4.06928		0.909004	NO	1.10011	NO
mmu-miR-202-3p	3.11143	3.15809	3.21407	3.16119		3.2062	3.61909	3.6255	3.48359		0.907452	NO	1.10199	NO
mmu-miR-218	1.87621	2.93631	2.97139	2.59464		2.76321	2.96551	2.86517	2.86463		0.90575	NO	1.10406	NO
mmu-miR-23a	1.83572	2.42856	2.47326	2.24585		2.4104	2.52299	2.51349	2.48229		0.904746	NO	1.10528	NO
mmu-miR-761	0.077836	0.111184	0.0803326	0.0897841		0.0949167	0.0895953	0.113954	0.0994888		0.902454	NO	1.10809	NO
mmu-miR-654-5p	0.0188821	0.0267919	0.0309253	0.0255331		0.0309069	0.0219387	0.0322103	0.028352		0.900576	NO	1.1104	NO
mmu-miR-694	0.056576	0.0897553	0.097448	0.0812598		0.0889881	0.0892859	0.0928079	0.0903606		0.899283	NO	1.112	NO
mmu-miR-503*	0.981838	1.40809	1.37777	1.2559		1.28946	1.26772	1.63362	1.39693		0.899041	NO	1.1123	NO
mmu-miR-10b	1.89375	2.1845	2.39248	2.15691		2.33623	2.40595	2.45902	2.4004		0.898563	NO	1.11289	NO
mmu-miR-130a	3.24249	3.49728	3.59943	3.4464		3.69181	4.25845	3.55879	3.83635		0.898354	NO	1.11315	NO
mmu-miR-199a-5p	2.00437	2.58368	3.00945	2.5325		2.81099	3.0308	2.62517	2.82232		0.897311	NO	1.11444	NO
mmu-miR-1195	2.84945	2.34148	2.72528	2.63873		3.095	2.84543	2.89242	2.94428		0.896223	NO	1.11579	NO
mmu-miR-341	0.210335	0.120549	0.0681128	0.132999		0.122872	0.171149	0.151246	0.148423		0.896081	NO	1.11597	NO
mmu-miR-19b	0.58087	0.852506	0.499732	0.644369		0.522763	0.811966	0.829936	0.721555		0.893028	NO	1.11979	NO
mmu-miR-720	4.41002	4.31339	4.42177	4.38173		4.03904	5.21255	5.49362	4.91507		0.891488	NO	1.12172	NO
mmu-miR-450b-3p	0.617921	1.08066	0.869836	0.856138		0.793244	1.09067	1.00227	0.962062		0.889899	NO	1.12372	NO
mmu-miR-26a	3.6623	3.81443	4.25166	3.90946		3.69262	4.918	4.59251	4.40105		0.888304	NO	1.12574	NO
mmu-miR-194	0.294034	0.430923	0.42496	0.383306		0.450965	0.302733	0.541281	0.43166		0.88798	NO	1.12615	NO
mmu-miR-433	0.24295	0.440513	0.532673	0.405379		0.491285	0.422326	0.456456	0.456689		0.887648	NO	1.12657	NO
mmu-miR-103	3.69059	4.1347	3.98932	3.9382		3.77518	4.36403	5.17691	4.43871		0.887241	NO	1.12709	NO
mmu-miR-125a-5p	3.26221	4.27273	3.81033	3.78176		3.79494	4.3306	4.66526	4.2636		0.886987	NO	1.12741	NO
mmu-miR-125b-5p	3.38027	3.38098	3.84813	3.53646		3.94601	4.28473	3.73243	3.98772		0.886836	NO	1.1276	NO
mmu-miR-22	2.66283	2.64014	2.74559	2.68285		2.85281	3.19144	3.03515	3.02647		0.886464	NO	1.12808	NO
mmu-miR-345-3p	0.305475	0.451221	0.379803	0.378833		0.326483	0.520731	0.436806	0.428007		0.88511	NO	1.1298	NO
mmu-miR-200b	0.798939	1.29897	0.79528	0.964397		0.856786	1.17294	1.25708	1.0956		0.880244	NO	1.13605	NO
mmu-miR-199a-3p:9.1	2.61904	3.06944	3.38252	3.02367		3.17097	3.75016	3.38848	3.43653		0.87986	NO	1.13654	NO
mmu-miR-28*	0.515786	0.915639	0.791718	0.741048		0.66159	0.817769	1.04947	0.842944		0.879119	NO	1.1375	NO
mmu-miR-677	0.089889	0.103901	0.106073	0.0999543		0.10726	0.116561	0.117407	0.113743		0.878774	NO	1.13795	NO
mmu-miR-382	1.26433	1.98829	2.29421	1.84894		1.96588	1.90665	2.43962	2.10405		0.878755	NO	1.13797	NO
mmu-let-7d*	1.7298	1.52202	1.88426	1.71203		2.10243	1.7584	1.99359	1.95147		0.877301	NO	1.13986	NO
mmu-miR-615-3p	1.16308	1.56723	1.927	1.55244		1.64754	1.97796	1.6853	1.77027		0.87695	NO	1.14032	NO
mmu-miR-208b	0.0185419	0.0472362	0.0425664	0.0361148		0.0450473	0.0382912	0.0402313	0.0411899		0.876788	NO	1.14053	NO
mmu-miR-302a	0.00169726	0.00934908	0.0112076	0.00741798		0.00718338	0.0121495	0.00627713	0.00853667		0.868954	NO	1.15081	NO
mmu-let-7b	3.32053	3.2319	3.80084	3.45109		3.63207	4.75277	3.54383	3.97622		0.867931	NO	1.15217	NO
mmu-miR-196a*	0.0169765	0.0296747	0.0237639	0.0234717		0.0328982	0.0231031	0.0251407	0.0270473		0.867801	NO	1.15234	NO
mmu-miR-140	1.45567	1.16089	1.01376	1.21011		1.10072	1.32168	1.7867	1.40304		0.862492	NO	1.15943	NO
mmu-miR-30c-2*	0.174705	0.256517	0.23683	0.222684		0.233152	0.263142	0.279045	0.258446		0.861626	NO	1.1606	NO
mmu-miR-27b	2.68987	2.53824	2.58659	2.6049		2.86389	3.15035	3.09711	3.03712		0.857688	NO	1.16593	NO
mmu-miR-712	2.12536	1.92466	2.38385	2.14463		2.35412	2.64539	2.50493	2.50148		0.857344	NO	1.16639	NO
mmu-miR-18a	0.982235	1.40115	1.0075	1.13029		1.04821	1.39398	1.51293	1.31838		0.857338	NO	1.1664	NO
mmu-let-7d	3.29283	3.69161	3.99028	3.65824		3.33471	4.81185	4.66529	4.27062		0.856607	NO	1.1674	NO
mmu-miR-181a	2.83519	2.48051	2.73113	2.68228		2.80145	3.21033	3.3916	3.13446		0.855738	NO	1.16858	NO
mmu-miR-150	0.105731	0.154715	0.232841	0.164429		0.192553	0.233296	0.151236	0.192362		0.85479	NO	1.16988	NO
mmu-miR-582-3p	0.00973569	0.0252129	0.0199172	0.0182886		0.0123233	0.0304383	0.0215897	0.0214504		0.852598	NO	1.17289	NO
mmu-miR-1188	0.0304582	0.0492948	0.0727927	0.0508486		0.0800823	0.0501603	0.0489953	0.059746		0.851079	NO	1.17498	NO
mmu-miR-489	0.239051	0.337479	0.330565	0.302365		0.324429	0.37926	0.364636	0.356108		0.849082	NO	1.17774	NO
mmu-miR-290-3p	0.00561831	0.00722748	0.00740942	0.00675174		0.0106241	0.00705455	0.00628202	0.00798689		0.845352	NO	1.18294	NO
mmu-miR-760	0.0269827	0.0371784	0.036653	0.0336047		0.0430779	0.0476285	0.0285696	0.0397586		0.845218	NO	1.18313	NO
mmu-miR-342-3p	2.55633	3.33462	3.13645	3.00913		2.96058	3.23407	4.49128	3.56198		0.844793	NO	1.18372	NO
mmu-miR-16	2.70787	3.19589	3.3448	3.08285		3.39973	3.32498	4.23083	3.65185		0.84419	NO	1.18457	NO
mmu-miR-25	3.3649	3.82542	3.99084	3.72705		3.85308	4.3852	5.02099	4.41976		0.843271	NO	1.18586	NO
mmu-miR-1199	0.0383402	0.0312549	0.0269389	0.032178		0.0398443	0.0434141	0.0312884	0.0381823		0.842746	NO	1.1866	NO
mmu-miR-540-3p	0.627876	1.07926	1.17523	0.960789		1.30558	1.07868	1.05808	1.14745		0.837328	NO	1.19428	NO
mmu-miR-881*	0.0248891	0.0218198	0.0180003	0.0215697		0.025302	0.0277174	0.0243983	0.0258059		0.835844	NO	1.1964	NO
mmu-miR-148b	0.977613	1.20639	1.13682	1.10694		1.20195	1.17648	1.60417	1.32753		0.833835	NO	1.19928	NO
mmu-miR-211	0.0333332	0.0486327	0.0411002	0.041022		0.0399792	0.0498876	0.0578943	0.0492537		0.832871	NO	1.20067	NO
mmu-miR-490	0.05624	0.0367352	0.0507391	0.0479048		0.0596676	0.0422399	0.0707803	0.0575626		0.83222	NO	1.20161	NO
mmu-miR-670	0.0202782	0.0179804	0.0122566	0.0168384		0.0158429	0.0243101	0.0205693	0.0202408		0.831906	NO	1.20206	NO
mmu-miR-450b-5p	0.218783	0.17631	0.13972	0.178271		0.156531	0.265956	0.220974	0.214487		0.831151	NO	1.20315	NO
mmu-miR-1197	0.0742609	0.114768	0.0917857	0.093605		0.111412	0.116699	0.110776	0.112962		0.828641	NO	1.2068	NO
mmu-miR-499	0.0836754	0.0447408	0.10793	0.0787819		0.0399052	0.157413	0.0880397	0.0951194		0.828243	NO	1.20738	NO
mmu-miR-21	2.95505	2.99258	3.50551	3.15105		3.22567	4.49179	3.70667	3.80805		0.827471	NO	1.2085	NO
mmu-let-7f*	0.0709788	0.149839	0.0808823	0.100567		0.0692298	0.164888	0.130971	0.121696		0.826375	NO	1.2101	NO
mmu-miR-15a*	0.0755449	0.068316	0.0542693	0.0660434		0.0681217	0.118449	0.0532033	0.0799246		0.826322	NO	1.21018	NO
mmu-miR-217	0.0237203	0.0381275	0.0308638	0.0309038		0.0399596	0.0348478	0.0379578	0.0375884		0.822164	NO	1.2163	NO
mmu-miR-685	0.69194	0.850946	1.14989	0.897593		1.07779	1.30869	0.892078	1.09285		0.821331	NO	1.21754	NO
mmu-miR-129-3p	0.160386	0.53613	0.511412	0.402643		0.386287	0.506138	0.583029	0.491818		0.818682	NO	1.22148	NO
mmu-miR-128a:9.1	0.202095	0.496939	0.474524	0.391186		0.398055	0.505816	0.530372	0.478081		0.818241	NO	1.22213	NO
mmu-miR-148a	2.54503	2.99959	3.38863	2.97775		3.43061	3.51465	4.00582	3.65036		0.815742	NO	1.22588	NO
mmu-miR-450a-5p	1.26516	1.35276	1.46697	1.36163		1.59268	1.41623	2.00413	1.67101		0.814854	NO	1.22721	NO
mmu-miR-191*	0.0854871	0.0907195	0.0909833	0.0890633		0.107349	0.100463	0.120198	0.109337		0.814579	NO	1.22763	NO
mmu-miR-30a	1.67215	2.04913	1.53812	1.75313		1.44684	2.18028	2.84057	2.1559		0.813182	NO	1.22974	NO
mmu-miR-152	2.54794	3.41657	3.76891	3.24447		3.64431	4.60295	3.72863	3.99197		0.812751	NO	1.23039	NO
mmu-miR-199b*	2.0004	3.20952	3.35123	2.85372		3.33781	3.50804	3.69844	3.51476		0.811923	NO	1.23164	NO
mmu-miR-412:9.1	0.00848045	0.0181361	0.0202488	0.0156218		0.0218417	0.0175111	0.0185183	0.0192904		0.809824	NO	1.23484	NO
mmu-miR-210	1.16045	1.58562	1.4755	1.40719		1.57603	1.95678	1.68032	1.73771		0.809796	NO	1.23488	NO
mmu-let-7c	3.14418	3.75995	3.7782	3.56078		3.93505	5.03737	4.22586	4.39943		0.809373	NO	1.23552	NO
mmu-miR-127	1.31698	2.03397	2.16293	1.83796		2.24753	2.20982	2.35962	2.27232		0.808845	NO	1.23633	NO
mmu-miR-26b*	0.0600263	0.153154	0.120719	0.1113		0.139544	0.141969	0.132593	0.138035		0.806312	NO	1.24021	NO
mmu-miR-374	1.4696	2.6054	2.36372	2.14624		2.22318	2.70281	3.06633	2.66411		0.805612	NO	1.24129	NO
mmu-miR-350	1.00106	1.81835	1.55468	1.45803		1.53503	2.06496	1.84161	1.81387		0.803824	NO	1.24405	NO
mmu-miR-542-3p	0.763094	1.09487	0.832617	0.896861		0.892764	1.22797	1.22754	1.11609		0.803573	NO	1.24444	NO
mmu-miR-181d	0.271801	0.684276	0.676784	0.544287		0.511165	0.801976	0.721639	0.67826		0.802475	NO	1.24614	NO
mmu-miR-30d	2.49156	2.95749	3.0286	2.82588		2.91187	3.38336	4.27291	3.52271		0.802189	NO	1.24659	NO
mmu-miR-511	0.0382527	0.0799466	0.0491475	0.0557823		0.0751933	0.0817017	0.0526111	0.0698353		0.798768	NO	1.25193	NO
mmu-let-7i*	0.0317229	0.074919	0.021151	0.0425977		0.0360523	0.0743567	0.0499324	0.0534471		0.797006	NO	1.2547	NO
mmu-miR-30e*	1.41619	1.87139	1.82558	1.70438		2.07861	2.3184	2.02822	2.14175		0.795792	NO	1.25661	NO
mmu-miR-155	0.0730592	0.194251	0.237746	0.168352		0.190224	0.193234	0.251934	0.211797		0.794873	NO	1.25806	NO
mmu-let-7a	3.54115	3.92082	4.15354	3.87184		4.06376	4.96819	5.59294	4.87496		0.794229	NO	1.25908	NO
mmu-miR-199a-3p,mmu-miR-199b	2.7574	3.5982	3.57353	3.30971		3.6651	4.76085	4.07768	4.16788		0.7941	NO	1.25929	NO
mmu-miR-337-5p	0.462971	0.882456	0.712234	0.685887		0.807404	0.965268	0.828127	0.866933		0.791165	NO	1.26396	NO
mmu-miR-674*	0.627505	0.838476	0.90604	0.790674		0.872328	0.958717	1.17279	1.00128		0.789665	NO	1.26636	NO
mmu-miR-574-3p	0.587251	0.718633	1.01543	0.773773		1.00335	0.987585	0.957082	0.982673		0.787416	NO	1.26998	NO
mmu-miR-24	2.46449	2.57608	2.70578	2.58212		2.89393	3.16348	3.78968	3.28236		0.786664	NO	1.27119	NO
mmu-miR-666-3p	0.0641465	0.0867625	0.0784347	0.0764479		0.0949677	0.109745	0.0873218	0.0973447		0.785332	NO	1.27335	NO
mmu-miR-134	1.16058	1.81281	1.81861	1.59733		2.02221	1.90509	2.17745	2.03491		0.784964	NO	1.27394	NO
mmu-miR-107	1.20046	1.72293	1.31386	1.41242		1.45779	2.40135	1.54554	1.80156		0.783996	NO	1.27552	NO
mmu-miR-186	0.312356	0.74812	0.480385	0.51362		0.482751	0.760112	0.722619	0.655161		0.783961	NO	1.27557	NO
mmu-miR-703	0.277842	0.734842	0.508732	0.507139		0.666824	0.639065	0.635926	0.647272		0.783502	NO	1.27632	NO
mmu-miR-485*	0.294856	0.781745	0.866278	0.647626		0.900954	0.797923	0.782944	0.827274		0.782844	NO	1.27739	NO
mmu-miR-222	0.151192	0.244835	0.243183	0.21307		0.240554	0.31405	0.262821	0.272475		0.781981	NO	1.2788	NO
mmu-miR-676	0.770788	1.29615	1.248	1.10498		1.37375	1.54076	1.33976	1.41809		0.779201	NO	1.28337	NO
mmu-miR-18b	0.0428791	0.056604	0.026828	0.0421037		0.0368224	0.0691453	0.0561492	0.054039		0.779136	NO	1.28347	NO
mmu-miR-384-3p	0.00335503	0.00705468	0.00970955	0.00670642		0.00578319	0.00968176	0.0103576	0.00860753		0.779134	NO	1.28348	NO
mmu-miR-19a	0.533425	0.598622	0.315489	0.482512		0.408491	0.740245	0.710387	0.619707		0.778613	NO	1.28434	NO
mmu-miR-669c	1.22521	1.18302	1.56529	1.32451		1.71993	1.77422	1.65677	1.71697		0.77142	NO	1.29631	NO
mmu-miR-434-3p	1.97123	2.10027	2.62212	2.2312		2.85271	2.94314	2.88282	2.89289		0.771271	NO	1.29656	NO
mmu-miR-592	0.215321	0.471998	0.413591	0.36697		0.435683	0.505811	0.486888	0.476127		0.77074	NO	1.29745	NO
mmu-miR-335-3p	0.842115	1.15019	1.42032	1.13754		1.25761	1.23763	1.93593	1.47706		0.770143	NO	1.29846	NO
mmu-miR-293*	0.0243302	0.0471523	0.0495659	0.0403495		0.0475483	0.0562748	0.0535035	0.0524422		0.769408	NO	1.2997	NO
mmu-miR-139-3p	0.00580691	0.0228551	0.0229842	0.0172154		0.0257762	0.024949	0.0165033	0.0224095		0.768218	NO	1.30171	NO
mmu-miR-468	-0.00229847	3.01461e-05	0.000682227	-0.0005287		0.000195501	-0.00382135	0.0015612	-0.000688217		0.768218	NO	1.30171	NO
mmu-miR-99a	1.65992	1.89664	1.90947	1.82201		2.21633	2.16467	2.748	2.37633		0.766732	NO	1.30424	NO
mmu-miR-126-3p	1.92553	1.91923	2.57549	2.14008		2.38869	3.13925	2.85334	2.79376		0.766023	NO	1.30544	NO
mmu-miR-678	0.00478708	0.0282927	0.0226743	0.0185847		0.0259909	0.0216818	0.0254401	0.024371		0.762576	NO	1.31134	NO
mmu-miR-100	1.81463	2.83536	3.25257	2.63419		3.0088	3.4697	3.88742	3.45531		0.76236	NO	1.31172	NO
mmu-miR-365	1.24655	1.90737	1.80035	1.65142		2.06584	2.01951	2.43456	2.1733		0.759869	NO	1.31602	NO
mmu-miR-379	2.45371	3.04574	3.25497	2.91814		3.38644	4.38417	3.77139	3.84733		0.758484	NO	1.31842	NO
mmu-miR-214*	0.623776	1.03476	1.11059	0.923041		1.23201	1.25035	1.16883	1.21706		0.758417	NO	1.31854	NO
mmu-miR-154*	0.189534	0.290296	0.271868	0.250566		0.288171	0.295095	0.408767	0.330678		0.757734	NO	1.31972	NO
mmu-miR-340-5p	0.855349	0.921887	0.746222	0.841153		0.840015	1.12287	1.37572	1.11287		0.755844	NO	1.32302	NO
mmu-miR-690	3.18408	3.70247	4.13213	3.67289		3.98017	5.13367	5.48153	4.86513		0.754943	NO	1.3246	NO
mmu-miR-330	0.268705	0.240296	0.238622	0.249208		0.221403	0.343606	0.425878	0.330296		0.7545	NO	1.32538	NO
mmu-miR-532-3p	0.549318	0.67699	0.701059	0.642456		0.752522	1.0409	0.764972	0.852798		0.753351	NO	1.3274	NO
mmu-miR-299*	0.764894	0.858991	1.09088	0.904922		1.25442	1.03426	1.32209	1.20359		0.751852	NO	1.33005	NO
mmu-miR-181c	0.621125	1.05496	0.625591	0.767227		0.802654	1.2397	1.02617	1.02284		0.750094	NO	1.33317	NO
mmu-miR-667	0.367252	0.734875	1.08336	0.728496		1.17247	0.644032	1.11133	0.975944		0.746453	NO	1.33967	NO
mmu-miR-467f	0.0808106	0.218442	0.197051	0.165435		0.226786	0.249384	0.189272	0.221814		0.745826	NO	1.3408	NO
mmu-miR-144:9.1	0.0620211	0.191412	0.194953	0.149462		0.206153	0.181106	0.214167	0.200475		0.745538	NO	1.34131	NO
mmu-miR-323-3p	0.293452	0.521846	0.575785	0.463694		0.551483	0.545225	0.772213	0.622974		0.744324	NO	1.3435	NO
mmu-miR-196b	0.187844	0.172443	0.174939	0.178409		0.204268	0.221589	0.294837	0.240231		0.742653	NO	1.34652	NO
mmu-miR-433*	0.183571	0.167127	0.203242	0.184647		0.210029	0.273407	0.262844	0.24876		0.742269	NO	1.34722	NO
mmu-miR-124	0.0369386	0.0652613	0.0556016	0.0526005		0.0561294	0.0853052	0.0718112	0.0710819		0.739998	NO	1.35135	NO
mmu-miR-34a	0.668426	1.20194	0.743338	0.871233		0.883091	1.48969	1.16339	1.17872		0.739132	NO	1.35294	NO
mmu-miR-125b-3p	0.0498412	0.148976	0.142848	0.113888		0.144306	0.166868	0.152003	0.154393		0.737655	NO	1.35565	NO
mmu-miR-455*	0.211144	0.365917	0.280607	0.28589		0.324491	0.46784	0.372571	0.388301		0.736258	NO	1.35822	NO
mmu-miR-429	0.248851	0.624055	0.323859	0.398922		0.330441	0.77859	0.518409	0.54248		0.735367	NO	1.35987	NO
mmu-miR-494	1.01901	1.30263	1.14679	1.15614		1.40592	1.91835	1.39289	1.57239		0.735278	NO	1.36003	NO
mmu-miR-15a	0.650547	0.922569	0.864057	0.812391		0.996898	0.901893	1.42471	1.10783		0.733314	NO	1.36367	NO
mmu-miR-701	0.329085	0.338992	0.356668	0.341582		0.523455	0.401991	0.474069	0.466505		0.732215	NO	1.36572	NO
mmu-miR-376b	1.30039	1.7062	1.49524	1.50061		1.92674	2.13991	2.08642	2.05102		0.731638	NO	1.3668	NO
mmu-miR-488*	3.287e-05	0.00628471	0.0089943	0.00510396		0.00810507	0.00615332	0.00672753	0.00699531		0.729626	NO	1.37057	NO
mmu-miR-327	0.0157125	0.0386416	0.033315	0.0292231		0.0442988	0.0415667	0.0345897	0.0401517		0.727815	NO	1.37398	NO
mmu-miR-343	0.801948	1.09281	0.928568	0.94111		1.04255	1.59519	1.25305	1.29693		0.725646	NO	1.37808	NO
mmu-miR-96	0.111685	0.15958	0.12534	0.132201		0.160811	0.209386	0.177759	0.182652		0.723788	NO	1.38162	NO
mmu-miR-27a	1.44374	2.60668	2.32565	2.12536		2.64059	3.38062	2.81715	2.94612		0.721408	NO	1.38618	NO
mmu-miR-29a*	0.0923679	0.154535	0.107418	0.118107		0.132467	0.197429	0.161401	0.163766		0.721196	NO	1.38659	NO
mmu-miR-708*	0.097135	0.209441	0.131685	0.146087		0.182657	0.238544	0.186641	0.202614		0.721011	NO	1.38694	NO
mmu-miR-666-5p	0.035847	0.0865581	0.0966641	0.0730231		0.108239	0.100461	0.0965186	0.10174		0.717744	NO	1.39325	NO
mmu-miR-339-5p	0.456948	0.803475	0.653925	0.638116		0.853883	0.967691	0.852326	0.8913		0.715938	NO	1.39677	NO
mmu-miR-698	-0.00339851	0.000985766	-0.000283405	-0.000898717		-0.00032328	-0.000612221	-0.00283074	-0.00125541		0.715874	NO	1.39689	NO
mmu-miR-709	1.49442	1.65125	2.03194	1.72587		2.61108	2.2272	2.4045	2.41426		0.714866	NO	1.39886	NO
mmu-miR-145	2.80117	3.43211	3.53242	3.25523		3.91048	5.08783	4.677	4.55843		0.714112	NO	1.40034	NO
mmu-miR-341:9.1	0.099036	0.154525	0.110059	0.121207		0.171687	0.177273	0.160965	0.169975		0.713086	NO	1.40236	NO
mmu-miR-412	0.0139111	0.0686127	0.0614325	0.0479854		0.0690081	0.0675764	0.0655191	0.0673679		0.712289	NO	1.40392	NO
mmu-miR-700	0.145189	0.248934	0.184788	0.19297		0.26653	0.278967	0.272119	0.272539		0.708047	NO	1.41234	NO
mmu-miR-409-5p	0.747799	1.5682	1.77742	1.36447		2.06176	1.51178	2.21562	1.92972		0.707084	NO	1.41426	NO
mmu-miR-760:9.1	-0.00151341	-0.00235657	-0.00448812	-0.00278603		-0.00269283	-0.00465819	-0.00448627	-0.00394576		0.706083	NO	1.41626	NO
mmu-miR-466j	0.00770149	0.0128537	0.0156213	0.0120588		0.016592	0.0191912	0.0155604	0.0171145		0.704596	NO	1.41925	NO
mmu-miR-665	0.158287	0.510056	0.436364	0.368236		0.514407	0.574275	0.481273	0.523319		0.703655	NO	1.42115	NO
mmu-miR-146b*	0.0149376	0.0496037	0.0446228	0.036388		0.054407	0.0471617	0.0539552	0.0518413		0.701912	NO	1.42468	NO
mmu-miR-340-3p	0.544979	0.911346	0.873202	0.776509		0.849578	1.39829	1.07242	1.10676		0.701605	NO	1.4253	NO
mmu-miR-1224	0.0460556	0.0660936	0.0744205	0.0621899		0.0846492	0.101705	0.0803051	0.0888864		0.699656	NO	1.42927	NO
mmu-miR-411	1.38889	2.13985	1.79116	1.7733		2.59515	1.93779	3.08113	2.53802		0.698693	NO	1.43124	NO
mmu-miR-215	0.0353826	0.115243	0.126526	0.0923837		0.124508	0.145135	0.132706	0.134116		0.688832	NO	1.45173	NO
mmu-miR-541	0.91503	1.22764	1.5803	1.24099		1.72862	1.76584	1.9216	1.80535		0.687395	NO	1.45477	NO
mmu-miR-329	0.741592	1.34669	1.84217	1.31015		2.02391	1.86719	1.87122	1.92077		0.682095	NO	1.46607	NO
mmu-miR-692	0.0047595	0.0206702	0.0240333	0.0164877		0.0314635	0.020176	0.021229	0.0242895		0.678798	NO	1.47319	NO
mmu-miR-679	0.309316	0.466991	0.422184	0.399497		0.497578	0.603182	0.668334	0.589698		0.67746	NO	1.4761	NO
mmu-miR-410	1.02303	1.52099	1.41475	1.31959		1.74274	1.95151	2.15265	1.94897		0.677071	NO	1.47695	NO
mmu-miR-10a	0.23862	0.394471	0.562836	0.398642		0.548269	0.514449	0.707596	0.590105		0.675545	NO	1.48029	NO
mmu-miR-669h-5p	0.0108568	0.0532104	0.0397212	0.0345961		0.048791	0.0622392	0.0426379	0.0512227		0.675407	NO	1.48059	NO
mmu-miR-464	-0.000546531	0.00584862	0.00323535	0.00284581		0.00360289	0.00253518	0.006519	0.00421902		0.674519	NO	1.48254	NO
mmu-miR-669f	1.53723	2.34195	2.91826	2.26581		3.48075	2.95927	3.66637	3.36879		0.672589	NO	1.48679	NO
mmu-miR-384-5p	-0.0011955	0.0118187	0.0135678	0.00806364		0.0112913	0.0124813	0.0123132	0.0120286		0.670371	NO	1.49171	NO
mmu-miR-805	0.511616	0.934889	0.730687	0.725731		0.907378	1.10114	1.24906	1.08586		0.668347	NO	1.49623	NO
mmu-miR-337-3p	0.302346	0.547921	0.482285	0.444184		0.724171	0.661739	0.615427	0.667112		0.665831	NO	1.50188	NO
mmu-miR-532-5p	0.734719	0.92156	0.941835	0.866038		1.04224	1.5832	1.28064	1.30203		0.665146	NO	1.50343	NO
mmu-miR-132	0.291494	1.03792	1.25548	0.861629		1.19807	1.46714	1.23278	1.29933		0.663134	NO	1.50799	NO
mmu-miR-465a-3p,mmu-miR-465b-3p,mmu-miR-465c-3p,mmu-miR-465a-3p,mmu-miR-465b-3p,mmu-miR-465c-3p,mmu-miR-465a-3p,mmu-miR-465b-3p,mmu-miR-465c-3p	1.46583	1.80473	2.31003	1.8602		2.79469	2.7483	2.87449	2.80583		0.662977	NO	1.50835	NO
mmu-miR-770-3p	0.00294635	0.00430642	0.00720084	0.00481787		0.00653067	0.00578612	0.0095778	0.0072982		0.660145	NO	1.51482	NO
mmu-miR-154	0.932643	2.01077	1.92557	1.62299		2.46414	2.68142	2.25907	2.46821		0.65756	NO	1.52077	NO
mmu-miR-1192	0.0138873	0.050819	0.0365863	0.0337642		0.0565587	0.0546711	0.0431457	0.0514585		0.656144	NO	1.52406	NO
mmu-miR-1191	0.104385	0.133169	0.124216	0.12059		0.142974	0.198913	0.21018	0.184022		0.655301	NO	1.52602	NO
mmu-miR-200a	0.410879	0.789909	0.474481	0.558423		0.560093	1.16462	0.846431	0.857049		0.651565	NO	1.53477	NO
mmu-miR-1194	0.00654535	0.0277951	0.0369366	0.023759		0.0362968	0.0425973	0.0305293	0.0364745		0.651388	NO	1.53518	NO
mmu-miR-299	0.116657	0.242651	0.167158	0.175488		0.237733	0.309805	0.261235	0.269591		0.650942	NO	1.53623	NO
mmu-miR-30e	1.34524	1.26954	1.33742	1.3174		1.71484	2.54571	1.81127	2.02394		0.650909	NO	1.53631	NO
mmu-miR-339-3p	0.108726	0.272138	0.192131	0.190998		0.227571	0.36139	0.293839	0.294267		0.649066	NO	1.54068	NO
mmu-miR-673-3p	-0.00359956	0.0186603	0.0178782	0.0109796		0.024946	0.0150607	0.0108201	0.0169422		0.648063	NO	1.54306	NO
mmu-miR-409-3p	0.97633	1.23429	1.64149	1.28404		1.71985	1.34865	2.88082	1.9831		0.647488	NO	1.54443	NO
mmu-miR-673-5p	0.125477	0.175962	0.179308	0.160249		0.219882	0.287856	0.234951	0.247563		0.647305	NO	1.54487	NO
mmu-miR-466f-3p	1.07482	1.04037	1.19361	1.10293		1.80842	1.3851	1.92546	1.70633		0.646378	NO	1.54708	NO
mmu-miR-187	0.133395	0.257192	0.201056	0.197214		0.241547	0.356887	0.318845	0.30576		0.644997	NO	1.55039	NO
mmu-miR-764-3p	-0.00287683	-0.00501848	-0.00509089	-0.00432873		-0.00497743	-0.00856449	-0.00668293	-0.00674162		0.642091	NO	1.55741	NO
mmu-miR-30b*	0.000719908	0.0316821	0.0373358	0.023246		0.0326581	0.0429275	0.0331152	0.0362336		0.641559	NO	1.5587	NO
mmu-miR-501-5p	0.1287	0.229508	0.159306	0.172505		0.200169	0.310105	0.297679	0.269318		0.640525	NO	1.56122	NO
mmu-miR-487b	0.26159	0.500379	0.590951	0.450973		0.753595	0.686745	0.680848	0.707063		0.637812	NO	1.56786	NO
mmu-miR-200b*	0.0116603	0.0341288	0.0277355	0.0245082		0.0338346	0.0401803	0.0416553	0.0385567		0.63564	NO	1.57322	NO
mmu-miR-689	0.0285044	0.0830137	0.0685126	0.0600102		0.113381	0.104414	0.0657389	0.0945115		0.634952	NO	1.57492	NO
mmu-miR-675-3p	0.0712466	0.204608	0.154814	0.143556		0.212971	0.220857	0.24455	0.226126		0.634851	NO	1.57517	NO
mmu-miR-10b*	0.0865698	0.341879	0.341083	0.256511		0.334918	0.472324	0.405472	0.404238		0.634553	NO	1.57591	NO
mmu-miR-669h-3p	0.0310104	0.0399282	0.0393811	0.0367732		0.0685129	0.0548357	0.0510045	0.0581177		0.632737	NO	1.58044	NO
mmu-miR-200c	0.105019	0.171587	0.229825	0.16881		0.266903	0.274643	0.25918	0.266909		0.632464	NO	1.58112	NO
mmu-miR-668	0.638787	0.863939	0.96608	0.822935		1.49893	1.39945	1.00598	1.30146		0.632318	NO	1.58148	NO
mmu-miR-653	-0.00513787	-0.000885001	-0.00129801	-0.00244029		-0.00241551	-0.00355334	-0.00573478	-0.00390121		0.625522	NO	1.59866	NO
mmu-miR-375	0.0285638	0.0551361	0.063082	0.0489273		0.0673037	0.0935014	0.0747029	0.0785027		0.623256	NO	1.60448	NO
mmu-miR-335-5p	1.21061	2.08114	2.00152	1.76443		2.45086	3.01089	3.06632	2.84269		0.620689	NO	1.61111	NO
mmu-miR-500	0.177008	0.327519	0.27508	0.259869		0.364237	0.534948	0.367568	0.422251		0.615438	NO	1.62486	NO
mmu-miR-872	0.102882	0.233375	0.116046	0.150767		0.14517	0.338779	0.253767	0.245905		0.613112	NO	1.63102	NO
mmu-miR-382*	0.641561	0.944428	0.910203	0.832064		0.994169	1.55437	1.53163	1.36006		0.611787	NO	1.63456	NO
mmu-miR-380-3p	0.0684539	0.143805	0.112748	0.108335		0.169448	0.194001	0.16879	0.177413		0.61064	NO	1.63763	NO
mmu-miR-1193	0.280723	0.565038	0.590069	0.47861		0.82217	0.607472	0.926925	0.785522		0.609289	NO	1.64126	NO
mmu-miR-219	0.110291	0.161132	0.0992234	0.123549		0.143661	0.270138	0.198116	0.203972		0.605715	NO	1.65094	NO
mmu-miR-671-3p	0.0967361	0.157274	0.171838	0.141949		0.176674	0.291301	0.237414	0.23513		0.603706	NO	1.65643	NO
mmu-miR-495	0.535504	1.17115	1.02647	0.911043		1.47129	1.51515	1.58078	1.52241		0.598423	NO	1.67106	NO
mmu-miR-127*	0.147841	0.367605	0.280297	0.265247		0.411056	0.541992	0.380548	0.444532		0.596689	NO	1.67592	NO
mmu-miR-125b*	0.0551556	0.112721	0.108725	0.0922004		0.152963	0.182349	0.128319	0.154544		0.596598	NO	1.67617	NO
mmu-miR-693-5p	0.00421311	0.0210976	0.0229777	0.0160961		0.0242346	0.0339526	0.023068	0.0270851		0.594281	NO	1.6827	NO
mmu-miR-34b-5p	0.023091	0.0810453	0.0662442	0.0567935		0.0673382	0.139239	0.0806873	0.0957548		0.593114	NO	1.68602	NO
mmu-miR-367	-0.0018551	0.00612818	0.0118939	0.00538901		0.00814732	0.00977809	0.00935919	0.00909487		0.592533	NO	1.68767	NO
mmu-miR-183*	0.0147753	0.0554319	0.0632876	0.0444982		0.0790409	0.07233	0.0743937	0.0752549		0.5913	NO	1.69119	NO
mmu-miR-7a	1.24611	2.29861	2.93895	2.16122		3.39059	3.99296	3.62924	3.67093		0.58874	NO	1.69854	NO
mmu-miR-325*	-0.00110985	-0.00384387	-0.00289857	-0.00261743		-0.00320497	-0.00390857	-0.00622417	-0.00444591		0.588728	NO	1.69858	NO
mmu-miR-465c-5p	1.0544	2.42672	2.37154	1.95088		3.05824	3.8103	3.08637	3.3183		0.587916	NO	1.70092	NO
mmu-miR-190b	0.0486893	0.155505	0.130209	0.111468		0.114792	0.241725	0.21292	0.189812		0.587253	NO	1.70284	NO
mmu-miR-185	0.55393	1.01149	1.08252	0.882645		1.04052	1.71467	1.763	1.50606		0.586061	NO	1.70631	NO
mmu-miR-92b	0.0819649	0.222896	0.255696	0.186852		0.325371	0.334667	0.29768	0.31924		0.585304	NO	1.70851	NO
mmu-let-7c-2*,mmu-let-7a*	0.136361	0.278276	0.195804	0.20348		0.226916	0.479518	0.337595	0.34801		0.584697	NO	1.71029	NO
mmu-miR-188-5p	0.0417596	0.118961	0.0837295	0.0814834		0.103462	0.154475	0.160396	0.139444		0.584343	NO	1.71132	NO
mmu-miR-376b*	0.815978	1.56205	1.68741	1.35515		2.01302	2.79376	2.20484	2.33721		0.579814	NO	1.72469	NO
mmu-miR-143	1.61443	2.14274	2.12101	1.95939		3.16307	3.67281	3.34233	3.39273		0.577527	NO	1.73152	NO
mmu-miR-879	-0.000177222	0.010255	0.0144286	0.00816882		0.0176811	0.018901	0.00589937	0.0141605		0.576874	NO	1.73348	NO
mmu-miR-197	0.0103021	0.025962	0.0521723	0.0294788		0.0487403	0.0640853	0.0405253	0.051117		0.576694	NO	1.73402	NO
mmu-miR-224	0.256892	0.741143	0.794477	0.597504		0.911087	1.12457	1.09009	1.04192		0.573465	NO	1.74378	NO
mmu-miR-693-3p	0.00239577	0.0204549	0.0236585	0.015503		0.0316713	0.0279266	0.0217297	0.0271092		0.571874	NO	1.74864	NO
mmu-miR-485	0.100154	0.221005	0.287213	0.202791		0.380948	0.343844	0.348437	0.357743		0.566862	NO	1.7641	NO
mmu-miR-31	0.480455	0.519965	0.686957	0.562459		0.884122	1.20872	0.884035	0.992293		0.566827	NO	1.76421	NO
mmu-miR-101b:9.1	0.320146	0.334572	0.294431	0.316383		0.453168	0.709634	0.51494	0.559247		0.56573	NO	1.76763	NO
mmu-miR-369-3p	0.407183	0.663754	0.584667	0.551868		0.781758	0.978018	1.18548	0.98175		0.562126	NO	1.77896	NO
mmu-miR-146a	0.357769	0.584455	0.476043	0.472756		0.764818	1.0989	0.66122	0.841645		0.561704	NO	1.7803	NO
mmu-miR-669d	0.620021	1.04623	1.1445	0.936918		1.63415	1.60491	1.77288	1.67065		0.560812	NO	1.78313	NO
mmu-miR-505	0.0201746	0.085767	0.0629802	0.0563072		0.0680523	0.127272	0.106431	0.100585		0.559796	NO	1.78637	NO
mmu-miR-496	0.224598	0.503618	0.53578	0.421332		0.695503	0.960762	0.605611	0.753959		0.558826	NO	1.78947	NO
mmu-miR-491	0.0446286	0.162023	0.117486	0.108046		0.184867	0.232693	0.164632	0.194064		0.556754	NO	1.79613	NO
mmu-miR-411*	0.10968	0.180741	0.158909	0.149777		0.215368	0.293628	0.300352	0.269783		0.555176	NO	1.80123	NO
mmu-miR-547	0.482617	0.961942	0.848839	0.764466		1.18529	1.44546	1.54456	1.39177		0.549276	NO	1.82058	NO
mmu-miR-192	0.194944	0.257512	0.245544	0.232667		0.28378	0.515765	0.471604	0.423716		0.549109	NO	1.82113	NO
mmu-miR-142-3p	0.60899	0.285026	0.472796	0.455604		0.52686	1.08373	0.891233	0.833941		0.546327	NO	1.83041	NO
mmu-miR-146b	0.217762	0.507518	0.518736	0.414672		0.602659	0.915481	0.775442	0.764527		0.54239	NO	1.84369	NO
mmu-miR-466a-3p,mmu-miR-466b-3p,mmu-miR-466c-3p,mmu-miR-466e-3p,mmu-miR-466a-3p,mmu-miR-466b-3p,mmu-miR-466c-3p,mmu-miR-466e-3p,mmu-miR-466b-3-3p,mmu-miR-466a-3p,mmu-miR-466b-3p,mmu-miR-466c-3p,mmu-miR-466e-3p,mmu-miR-466a-3p,mmu-miR-466b-3p,mmu-miR-466c-3p,mmu-miR-466e-3p	1.1658	1.416	1.90804	1.49661		2.46346	3.22197	2.64255	2.77599		0.539126	NO	1.85485	NO
mmu-miR-676*	0.025061	0.0942213	0.0703535	0.0632119		0.0774527	0.156215	0.118486	0.117385		0.538503	NO	1.857	NO
mmu-miR-551b:9.1	0.00284562	0.00975915	0.00951955	0.00737477		0.0141129	0.0155599	0.0114723	0.013715		0.537715	NO	1.85972	NO
mmu-miR-876-3p	-0.00556994	-0.00319918	0.000741491	-0.00267588		-0.00229519	-0.00476476	-0.00792235	-0.0049941		0.535808	NO	1.86634	NO
mmu-miR-539	0.296889	0.702751	0.797065	0.598902		0.893047	1.30061	1.17355	1.1224		0.533589	NO	1.8741	NO
mmu-miR-362-5p	0.0764022	0.132561	0.105851	0.104938		0.152042	0.284667	0.153359	0.196689		0.533521	NO	1.87434	NO
mmu-miR-470	0.793864	1.76891	2.28437	1.61571		3.17289	2.76816	3.19839	3.04648		0.530354	NO	1.88553	NO
mmu-miR-669e	0.321348	0.500944	0.473026	0.431773		0.76925	0.878514	0.798107	0.81529		0.529594	NO	1.88824	NO
mmu-miR-434-5p	0.680297	1.048	1.06	0.929432		1.40517	2.06834	1.82109	1.76487		0.52663	NO	1.89887	NO
mmu-miR-101b	0.269844	0.35307	0.30079	0.307901		0.46569	0.774429	0.534489	0.591536		0.520512	NO	1.92119	NO
mmu-miR-1190	0.0193498	0.0196989	0.0278399	0.0222962		0.0491273	0.0515452	0.028016	0.0428961		0.519772	NO	1.92392	NO
mmu-miR-216b	0.0064315	0.0173175	0.0230876	0.0156122		0.0254041	0.0357844	0.030053	0.0304138		0.513326	NO	1.94808	NO
mmu-miR-195	0.952103	1.80692	1.8975	1.55217		2.65314	3.2151	3.25249	3.04025		0.510542	NO	1.9587	NO
mmu-miR-466d-3p	0.446513	0.805677	1.02849	0.760227		1.46122	1.67046	1.35598	1.49588		0.508213	NO	1.96768	NO
mmu-miR-376a	0.100209	0.202366	0.170116	0.157564		0.252515	0.388224	0.291947	0.310895		0.506807	NO	1.97314	NO
mmu-miR-9*	0.0946578	0.0973775	0.0814306	0.0911553		0.0931489	0.249044	0.200244	0.180812		0.504144	NO	1.98356	NO
mmu-miR-362-3p	0.237721	0.261604	0.167978	0.222435		0.374368	0.598569	0.350846	0.441261		0.504088	NO	1.98378	NO
mmu-miR-713	0.00250463	0.0113207	0.0148783	0.00956788		0.0246158	0.0182918	0.0141304	0.0190127		0.503237	NO	1.98713	NO
mmu-miR-712*	0.0710019	0.148302	0.101378	0.106894		0.192311	0.262475	0.184861	0.213216		0.501342	NO	1.99465	NO
mmu-miR-383	0.0125119	0.0515036	0.0533098	0.0391085		0.0829549	0.0795316	0.0723063	0.0782643		0.499698	NO	2.00121	NO
mmu-miR-301a	0.293929	0.223542	0.154017	0.22383		0.304459	0.43065	0.612858	0.449322		0.498149	NO	2.00743	NO
mmu-miR-543	0.0922107	0.354886	0.427296	0.291464		0.502545	0.587238	0.665608	0.58513		0.498118	NO	2.00755	NO
mmu-miR-715	0.188319	0.179383	0.264139	0.210614		0.416678	0.472986	0.379769	0.423144		0.497736	NO	2.0091	NO
mmu-miR-300	0.00339342	0.00699406	0.00489236	0.00509328		0.0112019	0.0136756	0.00586888	0.0102488		0.496963	NO	2.01222	NO
mmu-miR-466h	0.39163	0.631988	0.750393	0.591337		1.28967	1.15932	1.13074	1.19324		0.495572	NO	2.01787	NO
mmu-miR-302a*	-0.00266221	0.0041431	0.00280321	0.00142803		0.0040996	0.00262006	0.00192979	0.00288315		0.495304	NO	2.01896	NO
mmu-miR-193b	0.609607	1.35073	1.30562	1.08865		2.10259	2.65789	1.84162	2.2007		0.494686	NO	2.02148	NO
mmu-miR-297a	0.267111	0.387043	0.431926	0.362027		0.664125	0.867421	0.666084	0.732543		0.494205	NO	2.02345	NO
mmu-miR-183	0.189786	0.378856	0.693763	0.420802		0.724146	0.917421	0.933578	0.858381		0.490227	NO	2.03987	NO
mmu-miR-201	0.576823	0.956292	0.792655	0.775256		1.25807	1.69597	1.79169	1.58191		0.490076	NO	2.0405	NO
mmu-miR-467e	0.68001	1.31949	1.53728	1.17893		2.17682	2.7721	2.34064	2.42985		0.485185	NO	2.06107	NO
mmu-miR-33*	0.123508	0.245341	0.182753	0.183867		0.25442	0.505562	0.379871	0.379951		0.483924	NO	2.06644	NO
mmu-miR-105	-0.000714321	0.00565689	0.0035744	0.00283899		0.00594651	0.0090542	0.00260645	0.00586905		0.483722	NO	2.0673	NO
mmu-miR-466f	0.32483	0.422782	0.5428	0.430137		0.807695	1.00064	0.886073	0.898135		0.478923	NO	2.08802	NO
mmu-miR-466g	0.476694	0.713731	0.864666	0.68503		1.38739	1.60508	1.33922	1.4439		0.474431	NO	2.10779	NO
mmu-miR-19a*	-0.00205892	0.00727251	0.0050926	0.00343539		0.0103431	0.00832012	0.00316878	0.00727733		0.472068	NO	2.11834	NO
mmu-miR-218-1*	-0.00178829	0.00453696	0.00584293	0.00286387		0.00879159	0.00629934	0.00322704	0.00610599		0.469026	NO	2.13208	NO
mmu-miR-369-5p	0.168941	0.434595	0.4738	0.359112		0.580312	0.849452	0.868125	0.765963		0.468837	NO	2.13294	NO
mmu-miR-136*	0.549657	0.680153	0.492175	0.573995		0.884931	1.61258	1.17558	1.22436		0.468811	NO	2.13306	NO
mmu-miR-449a	0.0158521	0.0545807	0.0743983	0.048277		0.0631522	0.153986	0.0926852	0.103275		0.467463	NO	2.13921	NO
mmu-miR-381	0.187763	0.544558	0.481523	0.404615		0.668968	1.00267	0.925382	0.865673		0.467399	NO	2.1395	NO
mmu-miR-136	0.202593	0.32201	0.290128	0.271577		0.580899	0.619557	0.55103	0.583829		0.465165	NO	2.14977	NO
mmu-miR-216a	0.00254831	0.00725525	0.00246177	0.00408844		0.00988922	0.00855462	0.00804095	0.00882826		0.463109	NO	2.15932	NO
mmu-miR-338-5p	0.0344099	0.0322937	0.0280233	0.0315756		0.0562483	0.105134	0.0431972	0.0681933		0.463031	NO	2.15968	NO
mmu-miR-27a*	0.00746815	0.0275788	0.0308458	0.0219643		0.0394694	0.0507936	0.0530809	0.0477813		0.459683	NO	2.17541	NO
mmu-miR-218-2*	0.0190961	0.0282251	0.0243192	0.0238801		0.0357937	0.0695728	0.0508783	0.0520816		0.458513	NO	2.18096	NO
mmu-miR-467a*,mmu-miR-467d*,mmu-miR-467a*,mmu-miR-467d*	0.470664	1.08608	1.26408	0.940276		2.0642	2.46936	1.74694	2.0935		0.449141	NO	2.22647	NO
mmu-miR-452	0.00257074	0.0155866	0.00996543	0.00937424		0.0168187	0.0240754	0.0218564	0.0209168		0.448167	NO	2.23131	NO
mmu-miR-190	0.364912	0.515846	0.592768	0.491175		0.658939	1.44765	1.22691	1.11117		0.442036	NO	2.26226	NO
mmu-miR-874	0.0235529	0.0607663	0.043817	0.0427121		0.0910073	0.124792	0.0745495	0.0967829		0.441319	NO	2.26594	NO
mmu-miR-182	0.138149	0.346416	0.662248	0.382271		0.773885	0.867766	0.960706	0.867452		0.440682	NO	2.26921	NO
mmu-miR-29c*	0.00568569	0.0366578	0.0222748	0.0215394		0.0404781	0.0616439	0.045421	0.049181		0.437963	NO	2.2833	NO
mmu-miR-9	0.399856	0.425011	0.385564	0.403477		0.535937	1.32326	0.905896	0.921697		0.437754	NO	2.28439	NO
mmu-miR-465b-5p	0.216534	0.835436	0.663748	0.571906		0.866391	3.04839	0.0386275	1.3178		0.433985	NO	2.30423	NO
mmu-miR-376c	0.23657	0.482082	0.555734	0.424795		0.765983	1.1138	1.06316	0.980981		0.433031	NO	2.3093	NO
mmu-miR-669a	0.420498	0.555384	0.631412	0.535765		1.23513	1.34301	1.13552	1.23789		0.432806	NO	2.3105	NO
mmu-miR-669b	0.0515133	0.0662551	0.0808477	0.0662053		0.127304	0.183197	0.154237	0.154913		0.427372	NO	2.33988	NO
mmu-miR-466i	0.36723	0.725637	0.831053	0.641307		1.60224	1.70183	1.24287	1.51564		0.423125	NO	2.36337	NO
mmu-miR-133a*	0.0161798	0.0221761	0.020625	0.0196603		0.0349094	0.066284	0.0390104	0.0467346		0.42068	NO	2.3771	NO
mmu-miR-31*	0.118798	0.172291	0.12396	0.13835		0.210562	0.478994	0.298606	0.329388		0.42002	NO	2.38084	NO
mmu-miR-376c*	0.0272677	0.0638699	0.0700191	0.0537189		0.0875948	0.146673	0.153908	0.129392		0.415165	NO	2.40868	NO
mmu-miR-466a-5p	0.210174	0.519337	0.477765	0.402425		0.85182	1.14362	0.930706	0.975383		0.412582	NO	2.42376	NO
mmu-let-7c-1*	-0.00309872	0.0206277	0.0157207	0.0110832		0.0245235	0.0330091	0.0235702	0.0270342		0.409971	NO	2.4392	NO
mmu-miR-376a*	0.146146	0.356974	0.319537	0.274219		0.589189	0.733156	0.699301	0.673882		0.406925	NO	2.45746	NO
mmu-miR-467h	0.0983685	0.293584	0.205393	0.199115		0.391256	0.561051	0.5205	0.490936		0.405583	NO	2.46559	NO
mmu-miR-92a*	0.00582028	0.0174745	0.0207434	0.0146794		0.0292093	0.047123	0.0324804	0.0362709		0.404715	NO	2.47087	NO
mmu-miR-200a*	-0.00358021	0.00988366	0.00421155	0.003505		0.0039618	0.0111105	0.0112666	0.00877963		0.399219	NO	2.50489	NO
mmu-miR-714	0.0620537	0.193744	0.283731	0.179843		0.510685	0.457286	0.384106	0.450692		0.399037	NO	2.50603	NO
mmu-miR-377	0.0965669	0.267329	0.22555	0.196482		0.354355	0.545246	0.579338	0.49298		0.39856	NO	2.50903	NO
mmu-miR-29c	0.265585	0.436898	0.357908	0.353463		0.687088	1.19113	0.787363	0.888527		0.397808	NO	2.51377	NO
mmu-miR-148a*	0.0109148	0.026167	0.0230254	0.0200358		0.0461418	0.0595712	0.046243	0.050652		0.395557	NO	2.52808	NO
mmu-miR-30c-1*	0.0059309	0.0592749	0.0781484	0.0477847		0.0993113	0.146154	0.119454	0.12164		0.392838	NO	2.54558	NO
mmu-miR-29a	0.198789	0.526529	0.497701	0.407673		0.949473	1.28004	0.917031	1.04885		0.388687	NO	2.57277	NO
mmu-miR-24-2*	0.0213825	0.037277	0.0382574	0.0323056		0.0616307	0.10772	0.0845754	0.0846421		0.381673	NO	2.62004	NO
mmu-miR-203	0.52587	1.21903	1.03566	0.926855		1.70675	2.93219	2.74506	2.46133		0.376566	NO	2.65558	NO
mmu-miR-297c*,mmu-miR-297a*,mmu-miR-297b-3p	0.277656	0.553682	0.616217	0.482518		1.16277	1.61227	1.08996	1.28834		0.374528	NO	2.67002	NO
mmu-miR-871	0.572449	1.38784	1.42309	1.12779		2.49192	3.96116	2.58152	3.01153		0.374492	NO	2.67028	NO
mmu-miR-467a	0.587886	1.24993	1.1059	0.981239		2.0687	3.26696	2.52677	2.62081		0.374403	NO	2.67092	NO
mmu-miR-463*	0.331282	0.823789	0.936469	0.69718		1.79301	1.80058	2.00455	1.86605		0.373613	NO	2.67657	NO
mmu-miR-696	0.12002	0.0689058	0.101448	0.0967913		0.282891	0.303464	0.191988	0.259448		0.373067	NO	2.68049	NO
mmu-miR-879*	-0.000145231	0.0112434	0.00517838	0.00542553		0.014415	0.0174334	0.0121228	0.0146571		0.370164	NO	2.70151	NO
mmu-miR-33	-0.00146004	0.0137656	0.00864513	0.00698356		0.0148531	0.0247	0.0181151	0.0192228		0.363297	NO	2.75257	NO
mmu-miR-431	0.0184012	0.0300239	0.0379199	0.0287817		0.0676457	0.0778467	0.0943122	0.0799348		0.360064	NO	2.77728	NO
mmu-miR-467c	0.300851	0.651835	0.58688	0.513189		1.52653	1.60226	1.23004	1.45295		0.353206	NO	2.83121	NO
mmu-miR-203*	0.0177576	0.0145272	0.0135276	0.0152708		0.0265268	0.0650579	0.0390485	0.0435444		0.350694	NO	2.85148	NO
mmu-miR-188-3p	0.00330588	0.0163254	0.0242022	0.0146112		0.0400357	0.0505728	0.0367067	0.0424384		0.344291	NO	2.90452	NO
mmu-miR-101a*	0.00997089	0.0107195	0.00216281	0.00761775		0.0102087	0.0382586	0.0183682	0.0222785		0.341933	NO	2.92455	NO
mmu-miR-205	0.0248125	0.0359395	0.0792906	0.0466809		0.139845	0.17799	0.0996403	0.139158		0.335451	NO	2.98106	NO
mmu-miR-141	0.0109987	0.0250106	0.0102475	0.0154189		0.0281273	0.0670462	0.0432048	0.0461261		0.334277	NO	2.99153	NO
mmu-miR-466c-5p	0.303524	0.408595	0.6463	0.452806		1.51487	1.49707	1.16221	1.39139		0.325435	NO	3.07281	mmu-miR-466c-5p
mmu-miR-450a-3p	-0.00177119	0.00949381	0.00414511	0.00395591		0.0099387	0.0159098	0.0106586	0.0121691		0.325079	NO	3.07617	mmu-miR-450a-3p
mmu-miR-465a-5p	0.333336	0.972817	1.38451	0.896888		2.57342	2.70748	3.00393	2.76161		0.324769	NO	3.07911	mmu-miR-465a-5p
mmu-miR-24-1*	0.0149502	0.0200461	0.017194	0.0173968		0.0416453	0.0716997	0.0493638	0.0542363		0.320759	NO	3.11761	mmu-miR-24-1*
mmu-miR-497	0.0933105	0.285577	0.312162	0.23035		0.662348	0.883575	0.625067	0.723663		0.318311	NO	3.14158	mmu-miR-497
mmu-miR-466f-5p	0.11226	0.125907	0.159846	0.132671		0.42244	0.484114	0.345462	0.417339		0.317898	NO	3.14566	mmu-miR-466f-5p
mmu-miR-380-5p	0.00820357	0.0538606	0.0484408	0.036835		0.0798448	0.152526	0.116878	0.116416		0.316408	NO	3.16048	mmu-miR-380-5p
mmu-miR-544	-0.000554276	0.00623387	0.0046869	0.0034555		0.00929601	0.0113971	0.0121146	0.0109359		0.315977	NO	3.16478	mmu-miR-544
mmu-miR-7b	0.083665	0.193942	0.171686	0.149765		0.433776	0.561588	0.43979	0.478384		0.313063	NO	3.19424	mmu-miR-7b
mmu-miR-204	0.283754	0.552869	0.401373	0.412665		0.76005	2.10563	1.10717	1.32428		0.311614	NO	3.2091	mmu-miR-204
mmu-miR-467e*	0.042005	0.100245	0.105069	0.0824398		0.223483	0.388647	0.188651	0.266927		0.308848	NO	3.23784	mmu-miR-467e*
mmu-miR-101a	0.151781	0.199054	0.120308	0.157048		0.287124	0.667167	0.609762	0.521351		0.301232	NO	3.3197	mmu-miR-101a
mmu-miR-467b	0.0220832	0.0226974	0.0232091	0.0226632		0.0609706	0.0993	0.0674599	0.0759101		0.298553	NO	3.34949	mmu-miR-467b
mmu-miR-338-3p	0.0784156	0.0567877	0.0757696	0.0703243		0.143561	0.367489	0.202903	0.237984		0.2955	NO	3.38409	mmu-miR-338-3p
mmu-miR-878-3p	0.289043	0.747035	0.904858	0.646979		1.89321	2.79533	1.94714	2.2119		0.2925	NO	3.41881	mmu-miR-878-3p
mmu-miR-880	0.520739	0.854218	0.88436	0.753106		2.25607	3.30679	2.40651	2.65646		0.2835	NO	3.52734	mmu-miR-880
mmu-miR-101a:9.1	0.0820197	0.152631	0.118742	0.117798		0.318899	0.543565	0.403604	0.422023		0.279126	NO	3.58261	mmu-miR-101a:9.1
mmu-miR-686	0.00575267	0.02001	0.0287537	0.0181721		0.0699596	0.0734623	0.0543342	0.0659187		0.275675	NO	3.62746	mmu-miR-686
mmu-miR-145*	0.00973701	0.0181225	0.0229564	0.0169386		0.0407083	0.0917204	0.0555252	0.0626513		0.270364	NO	3.69872	mmu-miR-145*
mmu-miR-29b	0.061536	0.0961138	0.0697176	0.0757891		0.169432	0.420544	0.257574	0.282517		0.268264	NO	3.72767	mmu-miR-29b
mmu-miR-466l	0.0201775	0.0288341	0.025108	0.0247065		0.0651923	0.113469	0.097927	0.0921962		0.267978	NO	3.73165	mmu-miR-466l
mmu-miR-133a	0.0231893	0.0839759	0.0636981	0.0569544		0.208684	0.259104	0.173003	0.213597		0.266644	NO	3.75031	mmu-miR-133a
mmu-miR-540-5p	-0.00511714	0.00984342	0.00590517	0.00354382		0.0146202	0.0189466	0.00665898	0.0134086		0.264294	NO	3.78366	mmu-miR-540-5p
mmu-miR-449b	-0.00110957	0.0051526	0.00390537	0.00264947		0.00890706	0.0116882	0.00958538	0.0100602		0.26336	NO	3.79708	mmu-miR-449b
mmu-miR-743a	0.243008	0.661345	0.707539	0.537297		1.89152	2.27291	2.02777	2.06407		0.26031	NO	3.84157	mmu-miR-743a
mmu-miR-741	0.240343	0.58241	0.706749	0.509834		1.59301	2.09799	2.20355	1.96485		0.259477	NO	3.8539	mmu-miR-741
mmu-miR-466e-5p	0.0993929	0.131763	0.149129	0.126762		0.483991	0.718725	0.369311	0.524009		0.241907	NO	4.13381	mmu-miR-466e-5p
mmu-miR-881	0.113909	0.313376	0.350565	0.259283		0.721165	1.41612	1.09023	1.07584		0.241006	NO	4.14927	mmu-miR-881
mmu-miR-878-5p	0.117298	0.382414	0.371955	0.290556		1.01459	1.48112	1.22698	1.2409		0.23415	NO	4.27077	mmu-miR-878-5p
mmu-miR-876-5p	0.0019735	0.000930317	-0.00151976	0.000461353		0.00316063	0.00253595	0.000279012	0.00199186		0.231619	NO	4.31744	mmu-miR-876-5p
mmu-miR-711	-0.00229004	0.00273867	0.00188592	0.000778181		0.00532951	0.00272041	0.00229492	0.00344828		0.225672	NO	4.43121	mmu-miR-711
mmu-miR-466k	0.0348656	0.0653785	0.0789172	0.0597204		0.279779	0.307714	0.215335	0.267609		0.223163	NO	4.48103	mmu-miR-466k
mmu-miR-297c	0.00677512	0.0102942	0.0115814	0.00955022		0.0448843	0.0590226	0.0256645	0.0431905		0.221119	NO	4.52246	mmu-miR-297c
mmu-miR-742	0.158586	0.541275	0.410405	0.370089		1.37303	1.89648	1.78058	1.68336		0.219851	NO	4.54854	mmu-miR-742
mmu-miR-29b*	-0.00729913	0.0229074	0.0269444	0.0141842		0.0586931	0.0845796	0.0524593	0.065244		0.217403	NO	4.59975	mmu-miR-29b*
mmu-miR-133b	0.0134173	0.0250071	0.0305124	0.0229789		0.0721245	0.159237	0.087884	0.106415		0.215937	NO	4.63098	mmu-miR-133b
mmu-miR-467b*	0.00197362	0.0161218	0.00905259	0.00904932		0.039891	0.0668743	0.0202628	0.0423427		0.213716	NO	4.6791	mmu-miR-467b*
mmu-miR-153	0.0460476	0.0684745	0.0801029	0.064875		0.222237	0.413105	0.29858	0.311307		0.208395	NO	4.79857	mmu-miR-153
mmu-miR-743b-3p	0.140703	0.424527	0.428282	0.33117		1.32413	1.93609	1.52945	1.59656		0.207428	NO	4.82096	mmu-miR-743b-3p
mmu-miR-759	-0.00538833	0.00413351	0.00392006	0.000888414		0.0045715	0.00416394	0.00426558	0.00433367		0.205002	NO	4.87799	mmu-miR-759
mmu-miR-297b-5p	0.0286232	0.0430974	0.0490219	0.0402475		0.168728	0.251719	0.170297	0.196915		0.204391	NO	4.89259	mmu-miR-297b-5p
mmu-miR-883b-5p	0.0473446	0.207809	0.331128	0.195427		0.948581	1.45294	0.792604	1.06471		0.18355	NO	5.44811	mmu-miR-883b-5p
mmu-miR-467d	0.0190476	0.0367501	0.0454134	0.033737		0.13004	0.266823	0.213041	0.203301		0.165946	NO	6.02606	mmu-miR-467d
mmu-miR-463	0.0434266	0.057644	0.056454	0.0525082		0.203415	0.536446	0.234879	0.324913		0.161607	NO	6.18785	mmu-miR-463
mmu-miR-883b-3p	0.0113064	0.0250386	0.0257758	0.0207069		0.0730878	0.22857	0.0868484	0.129502		0.159896	NO	6.25405	mmu-miR-883b-3p
mmu-miR-466b-5p	0.0286479	0.0825196	0.086586	0.0659178		0.312	0.689562	0.300035	0.433865		0.151932	NO	6.58191	mmu-miR-466b-5p
mmu-miR-883a-5p	0.0225589	0.0265077	0.0363681	0.0284783		0.174927	0.282734	0.173635	0.210432		0.135332	NO	7.38923	mmu-miR-883a-5p
mmu-miR-883a-3p	0.0605039	0.156442	0.169499	0.128815		0.751276	1.98117	0.835308	1.18925		0.108316	NO	9.23226	mmu-miR-883a-3p
mmu-miR-742*	0.0410463	0.0464833	0.0652936	0.0509411		0.317343	0.658383	0.474371	0.483366		0.105388	NO	9.48873	mmu-miR-742*
mmu-miR-471:9.1	0.0160115	0.0748128	0.112298	0.0677075		0.529086	0.993159	0.654626	0.725624		0.0933095	NO	10.717	mmu-miR-471:9.1
mmu-miR-470*	0.0148452	0.0547617	0.0536403	0.0410824		0.286659	0.711021	0.390423	0.462701		0.0887882	NO	11.2628	mmu-miR-470*
mmu-miR-471	0.0605565	0.122002	0.159893	0.114151		0.879274	1.50182	1.59762	1.32624		0.086071	NO	11.6183	mmu-miR-471
mmu-miR-1	0.00699907	-0.00154401	-0.00572796	-9.09669e-05		-0.00173482	0.000492048	-0.00244763	-0.00123014		0.0739486	NO	13.5229	mmu-miR-1
mmu-miR-743b-5p	-0.000999199	0.0196043	0.0335608	0.0173886		0.173925	0.319649	0.227095	0.240223		0.0723854	NO	13.8149	mmu-miR-743b-5p
mmu-miR-687	-0.00667294	-2.74799e-05	0.00316627	-0.00117805		0.031463	0.0224809	0.00964336	0.0211958		-0.0555794	NO	-17.9923	NO
mmu-miR-509-5p	-0.00604382	0.00325246	0.000761739	-0.00067654		0.0012525	0.00408062	0.00207377	0.00246896		-0.274018	NO	-3.6494	NO
mmu-miR-802	0.00559546	4.19847e-05	-0.0024471	0.00106345		-0.00223044	-0.00134193	-0.00558628	-0.00305288		-0.348342	NO	-2.87074	NO
mmu-miR-680	0.00333088	-0.000405257	0.000122212	0.00101595		0.00126557	-0.00058347	-0.00445214	-0.00125668		-0.808437	NO	-1.23695	NO
mmu-miR-144	0.00695062	-0.00135389	0.00138963	0.00232879		-0.0014407	-0.00515276	0.00160486	-0.00166287		-1.40046	NO	-0.714049	NO
mmu-miR-141*	-0.00154009	0.0019848	0.000863449	0.000436052		0.00129685	0.00124369	-0.00341799	-0.000292486		-1.49085	NO	-0.670758	NO
mmu-miR-509-3p	-0.000634165	-0.000408867	-0.00183023	-0.000957754		0.000965457	-0.000784121	-8.01311e-05	3.3735e-05		-28.3905	NO	-0.035223	NO
mmu-miR-302b*	-0.00694606	-0.0017709	-0.0016968	-0.00347125		0.00116325	0.00231532	-0.00342951	1.63524e-05		-212.278	NO	-0.00471081	NO
